# Supplementary material for: Azologization of serotonin 5-HT3 receptor antagonists
Source: publisher site journal article supplement (doi:10.3762/bjoc.15.74), 2019-03-25
Supplement: Additional file 1 [file 1860-5397-15-74-S1.pdf]

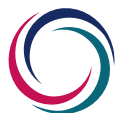

## Supporting Information

for

### **Azologization of serotonin 5-HT<sub>3</sub> receptor antagonists**

Karin Rustler, Galyna Maleeva, Piotr Bregestovski and Burkhard König

*Beilstein J. Org. Chem.* **2019**, *15*, 780–788. doi:10.3762/bjoc.15.74

**Detailed photochromic characterization (UV–vis absorption spectra, cycle performances, thermal half-lives) and NMR spectra of all synthesized compounds are provided. The file contains crystal structures of compounds 12b and 16a and experimental procedures**

## Table of contents

|                                                                           |     |
|---------------------------------------------------------------------------|-----|
| UV–vis absorption spectra, cycle performances and thermal half-lives..... | S2  |
| Tabular summarized photochemical data.....                                | S12 |
| $^1\text{H}$ and $^{13}\text{C}$ NMR spectra.....                         | S13 |
| X-ray structures .....                                                    | S23 |
| Experimental section.....                                                 | S27 |
| References.....                                                           | S31 |

# UV-vis absorption spectra, cycle performances and thermal half-lives.

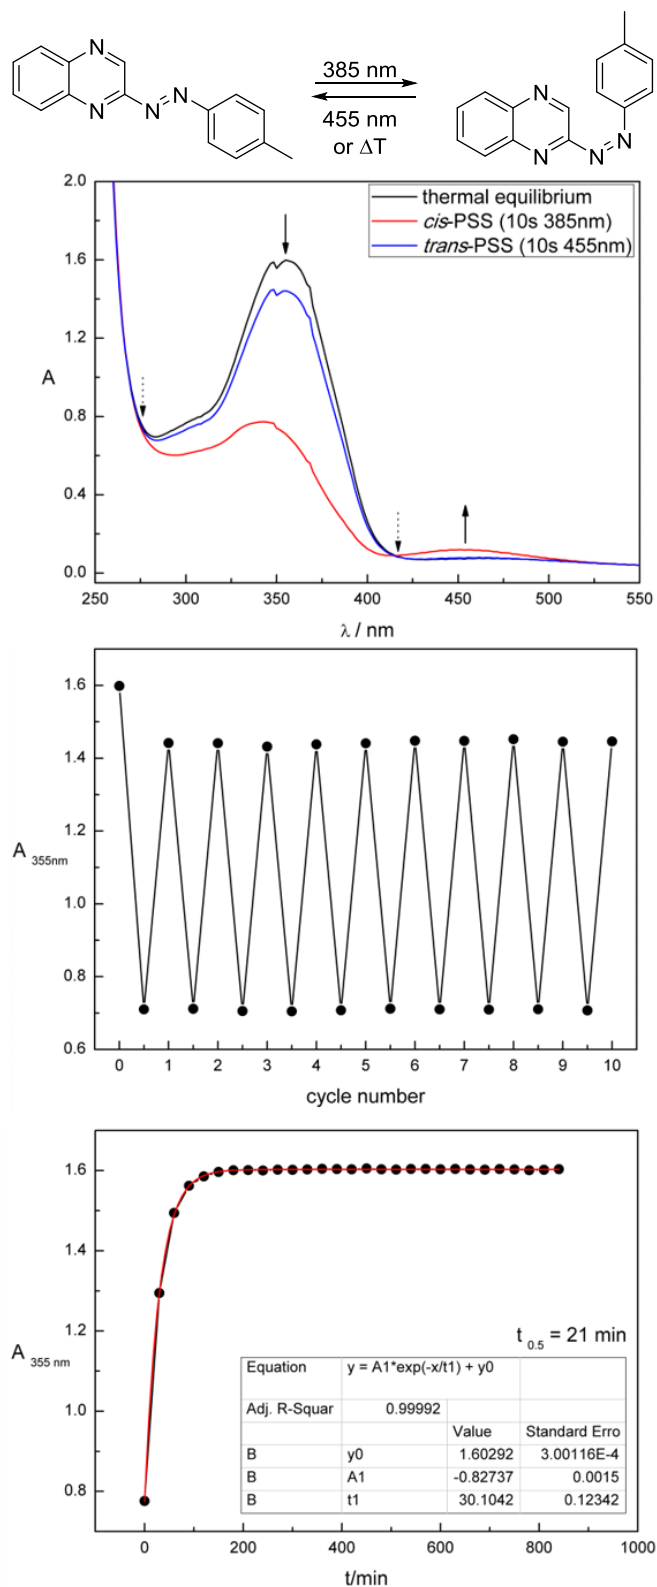

**Figure S1:** UV-vis absorption spectroscopic characterization of compound **5a** measured at 50  $\mu\text{M}$  in DMSO. **Upper panel.** UV-vis absorption spectrum upon continuous irradiation with the indicated wavelengths until the PSS is reached. Black arrows indicate the changes in the absorption upon *trans*–*cis* isomerization. Dotted black arrows indicate isosbestic points. **Middle panel.** Cycle performance. Changes in absorption at  $\lambda_{\text{max}}$  of the *trans*-isomer were measured during alternate

irradiation with the indicated wavelengths. **Lower panel.** Thermal half-life determined at  $\lambda_{\max}$  of the *trans*-isomer.

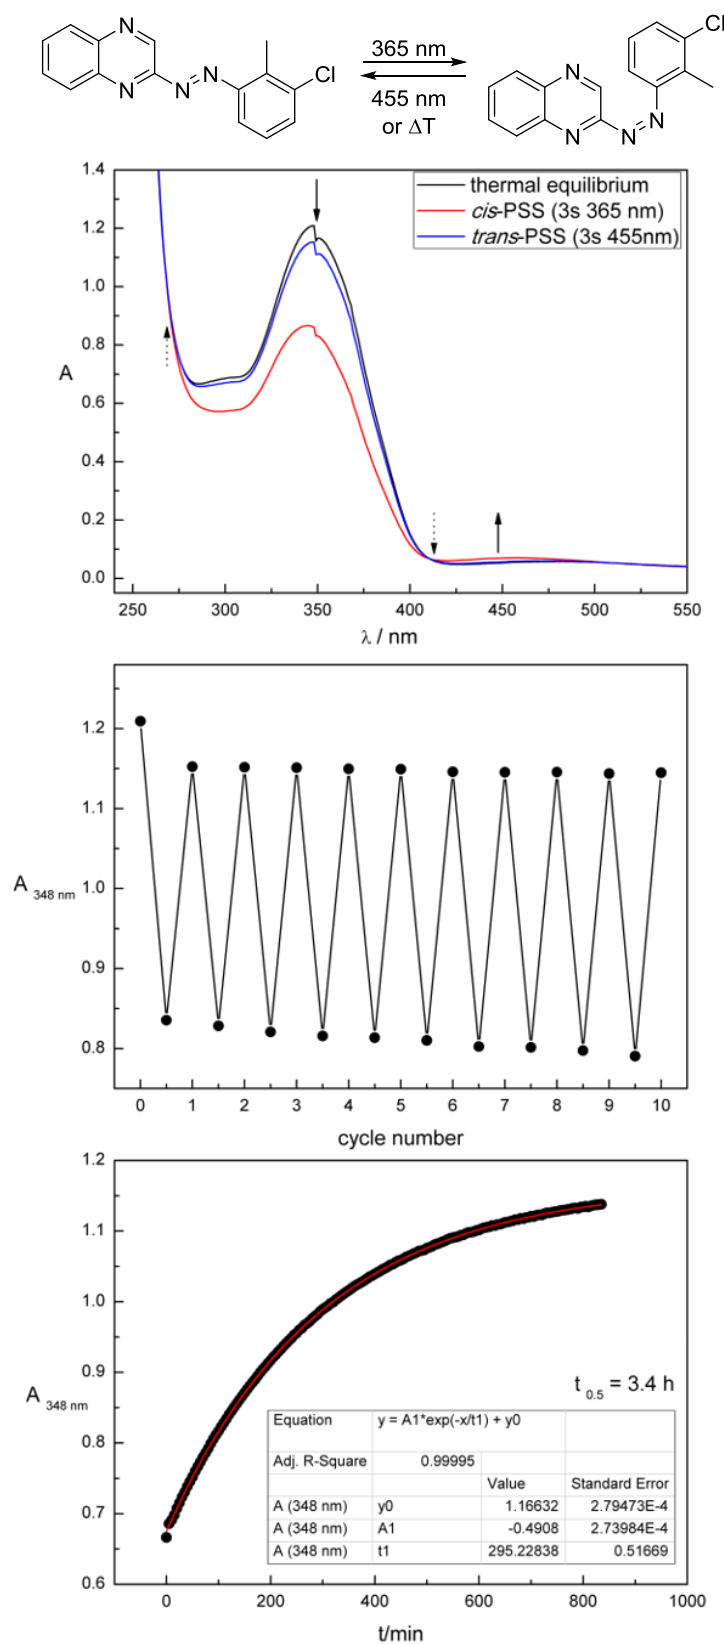

**Figure S2:** UV-vis absorption spectroscopic characterization of compound **5b** measured at 50  $\mu\text{M}$  in DMSO. **Upper panel.** UV-vis absorption spectrum upon continuous irradiation with the indicated

wavelengths until the PSS is reached. Black arrows indicate the changes in the absorption upon *trans*–*cis*-isomerization. Dotted black arrows indicate isosbestic points. **Middle panel.** Cycle performance. Changes in absorption at  $\lambda_{\text{max}}$  of the *trans*-isomer were measured during alternate irradiation with the indicated wavelengths. **Lower panel.** Thermal half-life determined at  $\lambda_{\text{max}}$  of the *trans*-isomer.

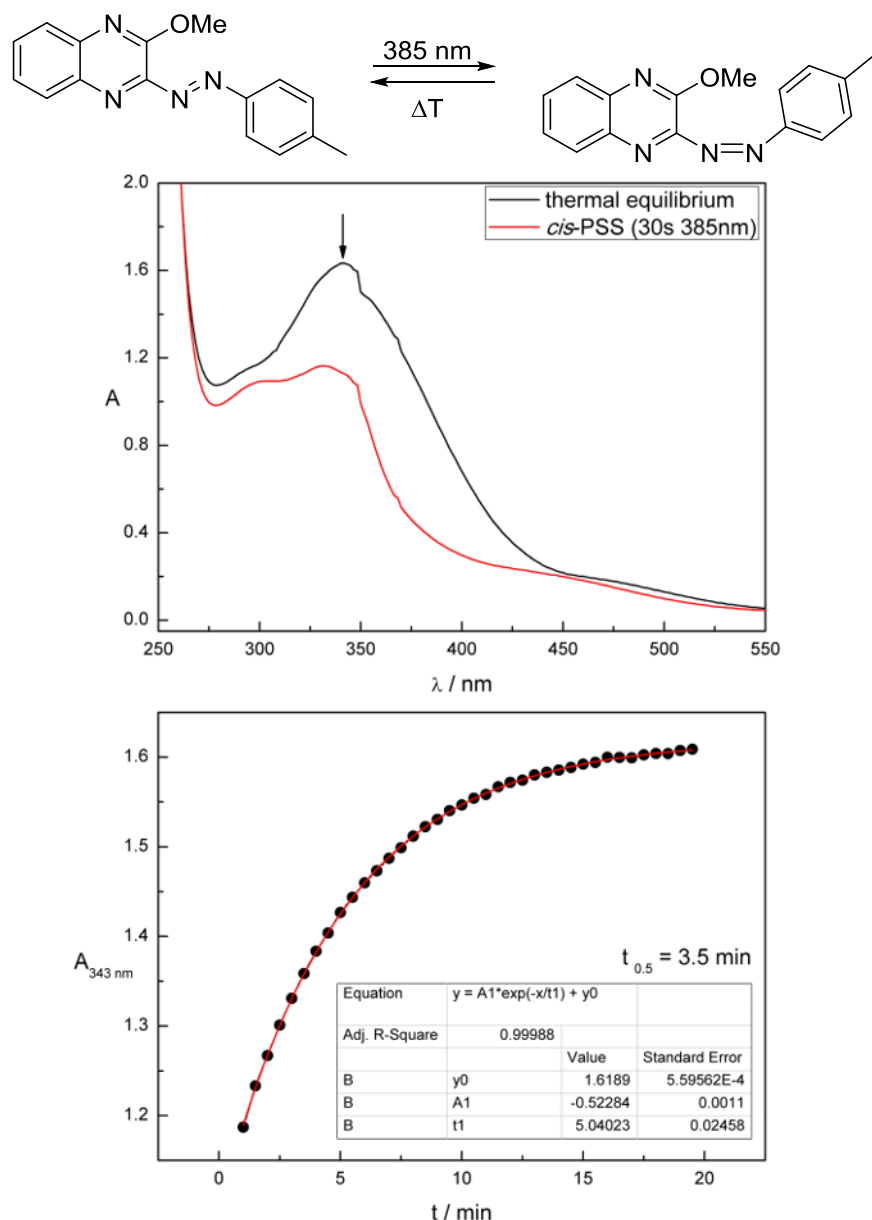

**Figure S3:** UV–vis absorption spectroscopic characterization of compound **12a** measured at 50  $\mu\text{M}$  in DMSO. As the *cis*–*trans* back isomerization is not triggerable by irradiation with light no cycle performance was recorded. **Upper panel.** UV–vis absorption spectrum upon continuous irradiation with the indicated wavelength until the PSS is reached. Black arrow indicates the change in the absorption upon *trans*–*cis*-isomerization. **Lower panel.** Thermal half-life determined at  $\lambda_{\text{max}}$  of the *trans*-isomer.

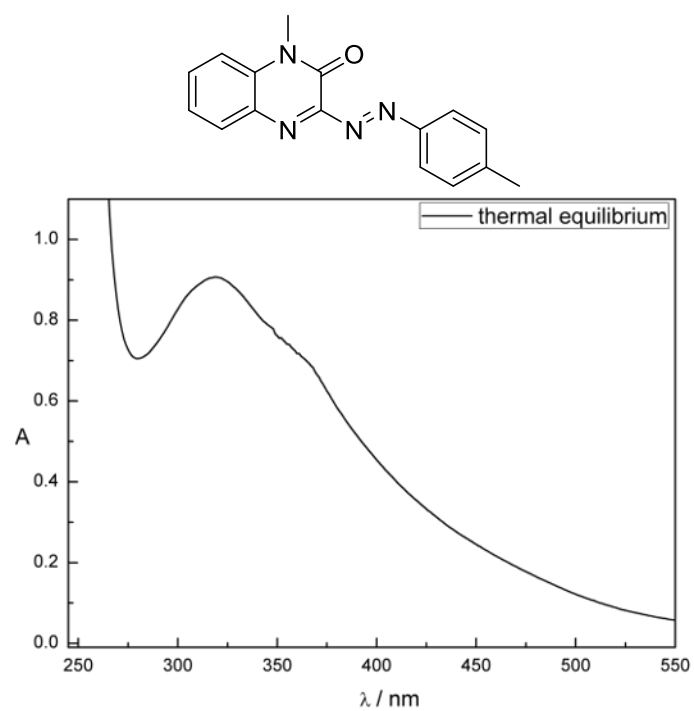

**Figure S4:** UV-vis absorption spectrum of non-photochromic compound **12b**.

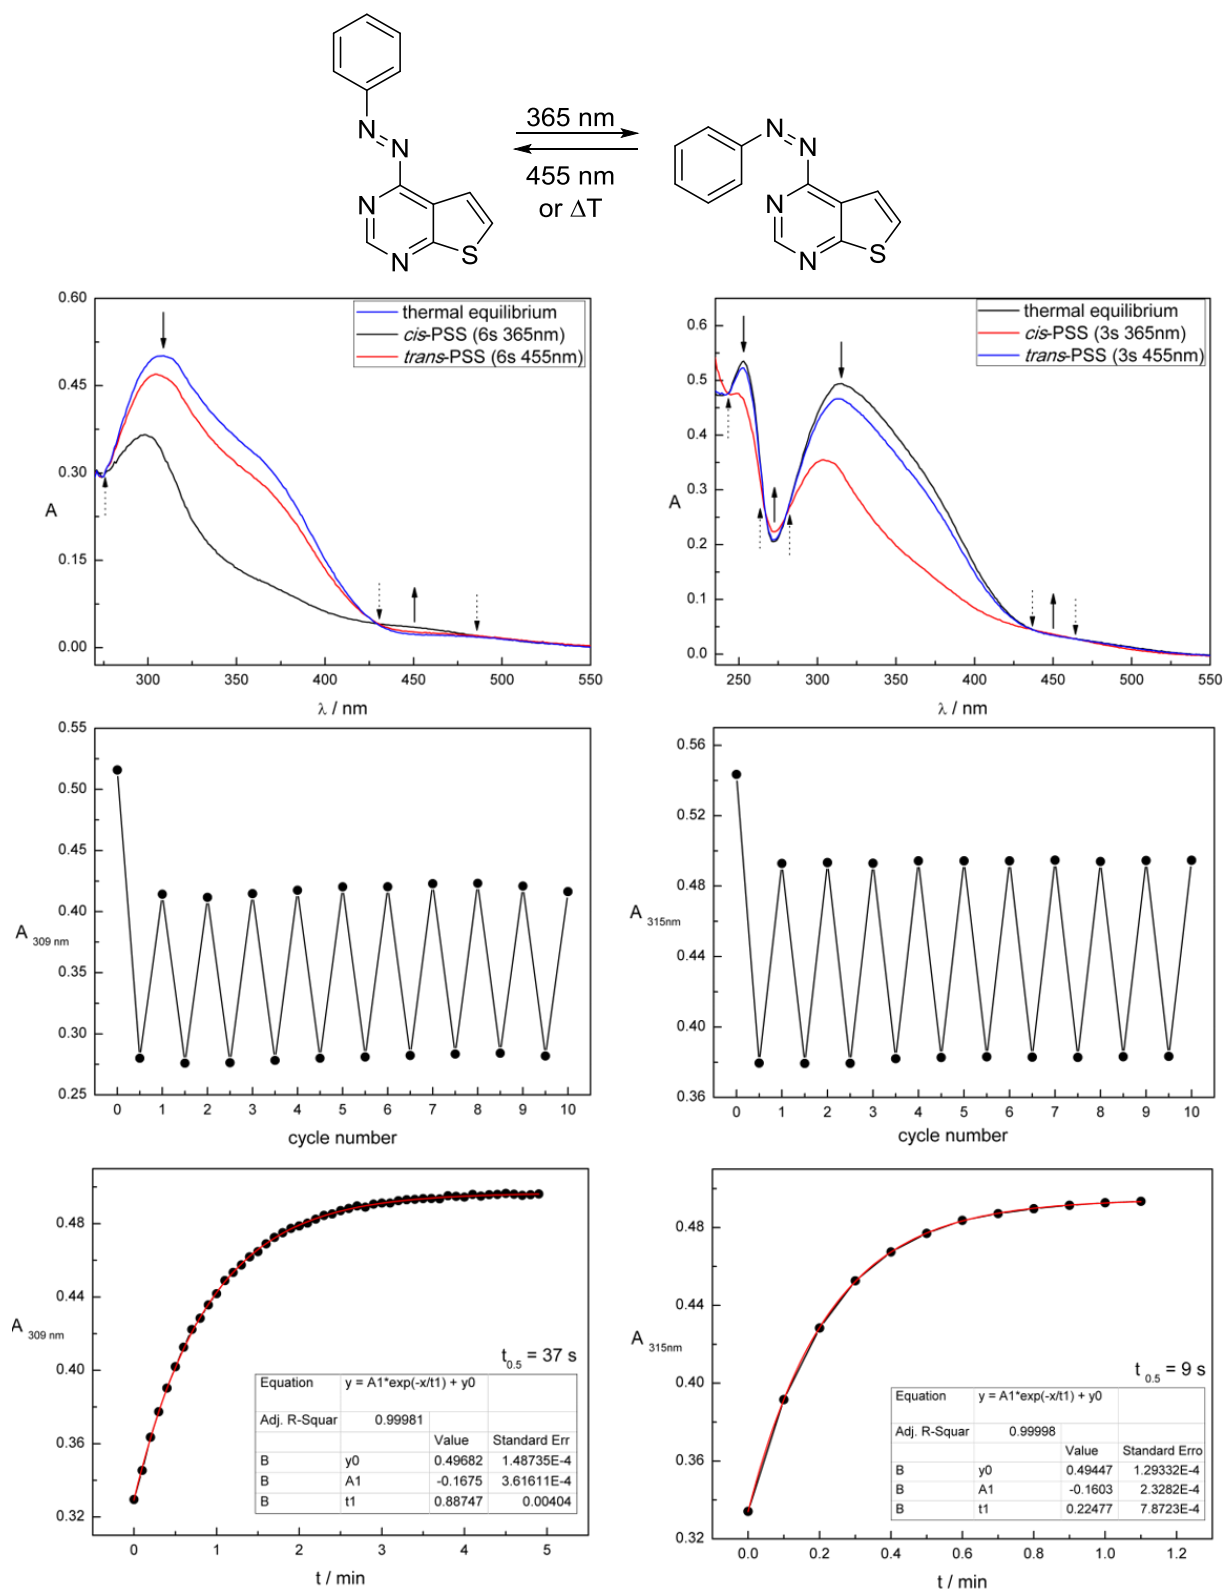

**Figure S5:** UV–vis absorption spectroscopic characterization of compound **16a** measured at 50  $\mu\text{M}$  in DMSO (left) and phosphate buffer + 0.1% DMSO (right), respectively. **Upper panel.** UV–vis absorption spectra upon continuous irradiation with the indicated wavelengths until the PSS is reached. Black arrows indicate the changes in the absorption upon *trans*–*cis*-isomerization. Dotted black arrows indicate isosbestic points. **Middle panel.** Cycle performances. Changes in absorption at  $\lambda_{\text{max}}$  of the *trans*-isomer were measured during alternate irradiation with the indicated wavelengths. **Lower panel.** Thermal half-lives determined at  $\lambda_{\text{max}}$  of the *trans*-isomer.

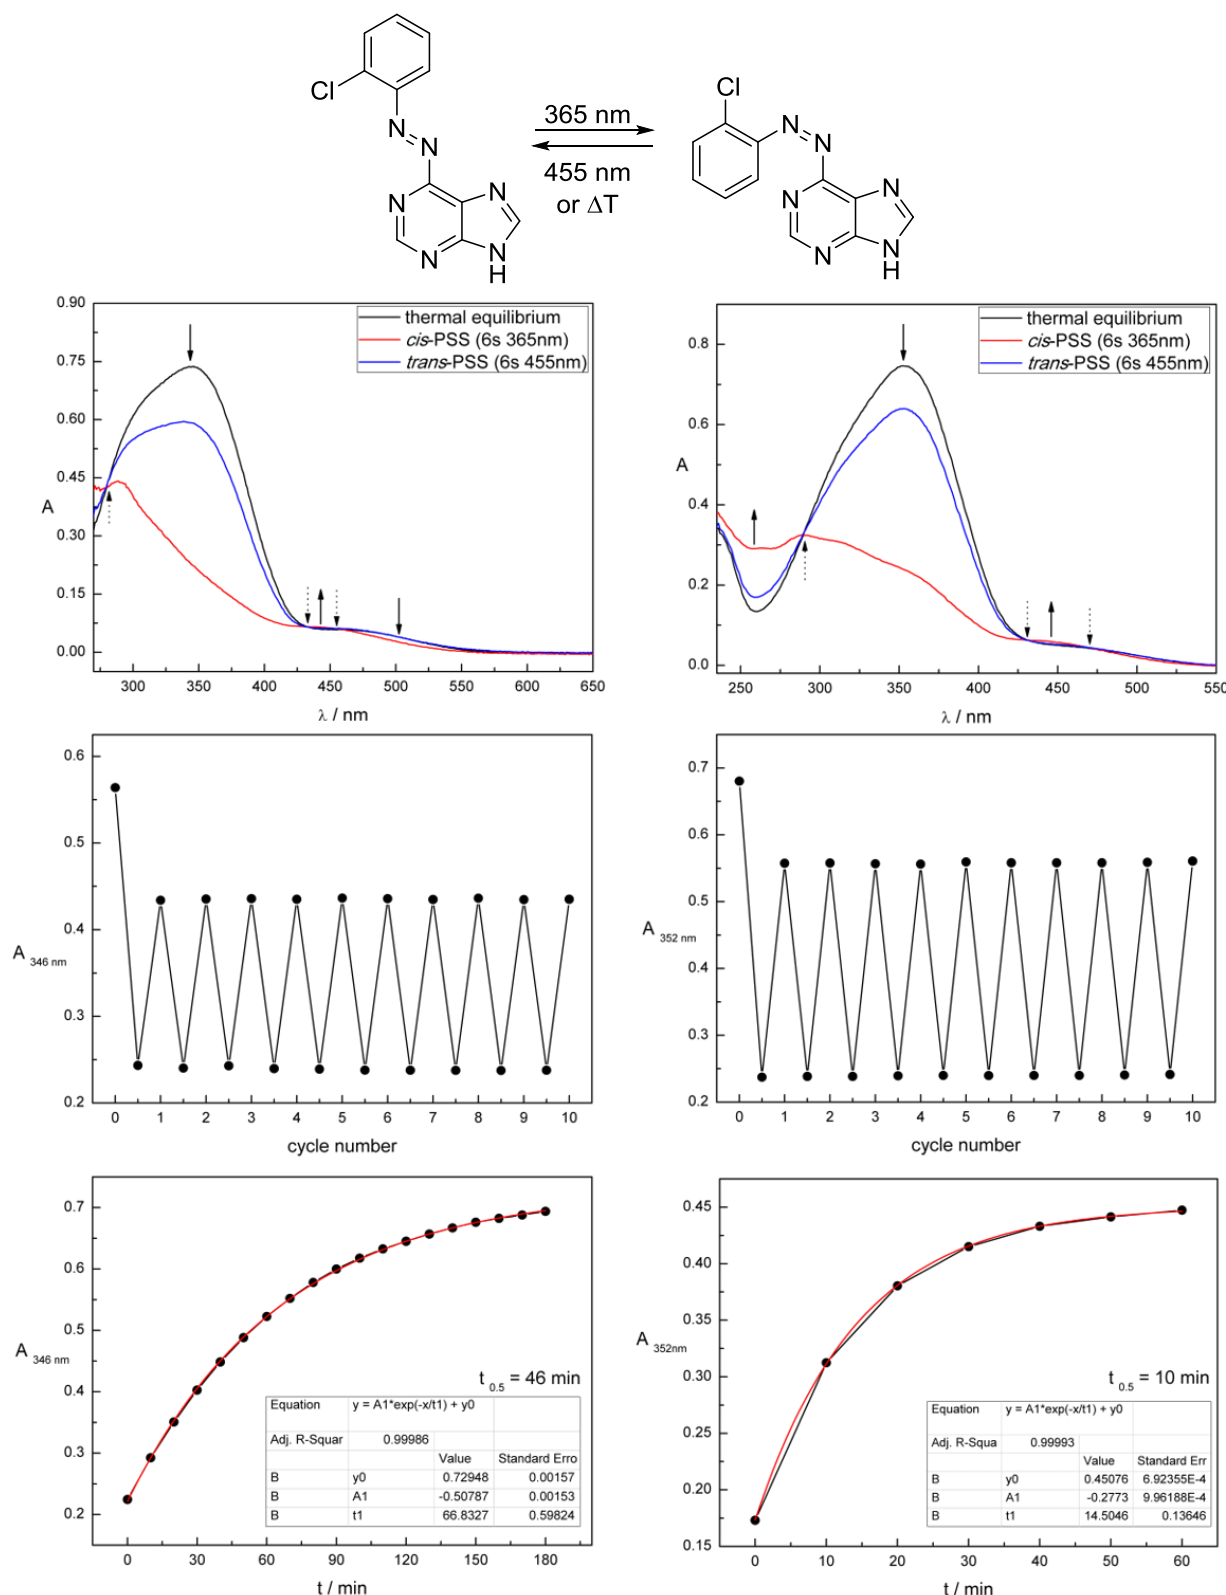



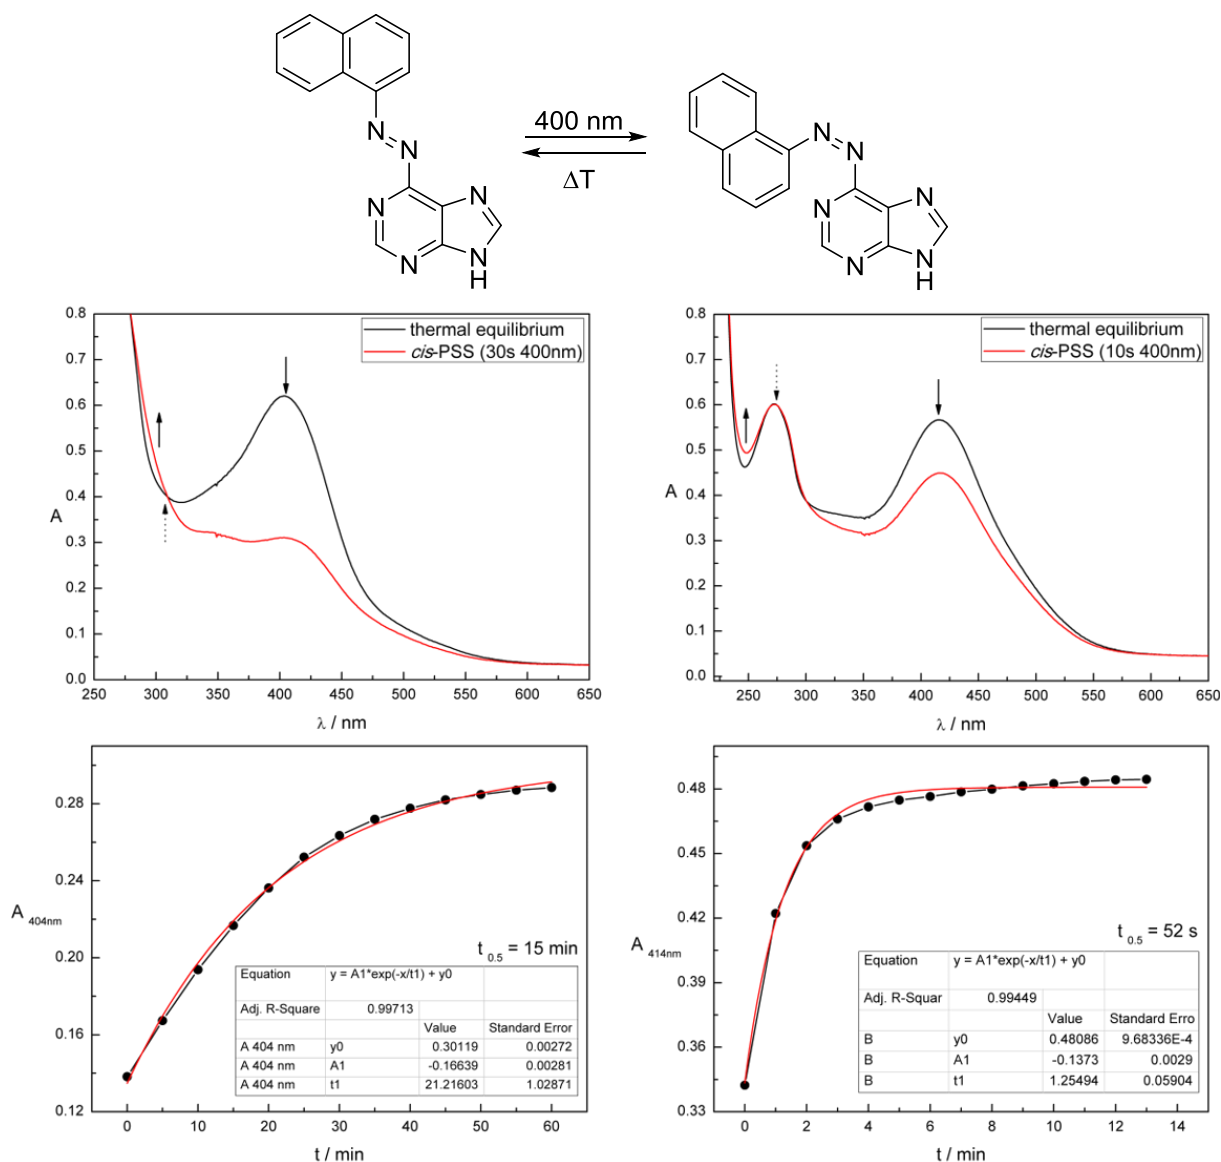

**Figure S7:** UV-vis absorption spectroscopic characterization of compound **16c** measured at 50  $\mu\text{M}$  in DMSO (left) and phosphate buffer + 0.1% DMSO (right), respectively. As the *cis*–*trans* back isomerization is not triggerable by irradiation with light no cycle performances were recorded. **Upper panel.** UV-vis absorption spectra upon continuous irradiation with the indicated wavelength until the PSS is reached. Black arrows indicate the change in the absorption upon *trans*–*cis*-isomerization. **Lower panel.** Thermal half-lives determined at  $\lambda_{\text{max}}$  of the *trans*-isomer.

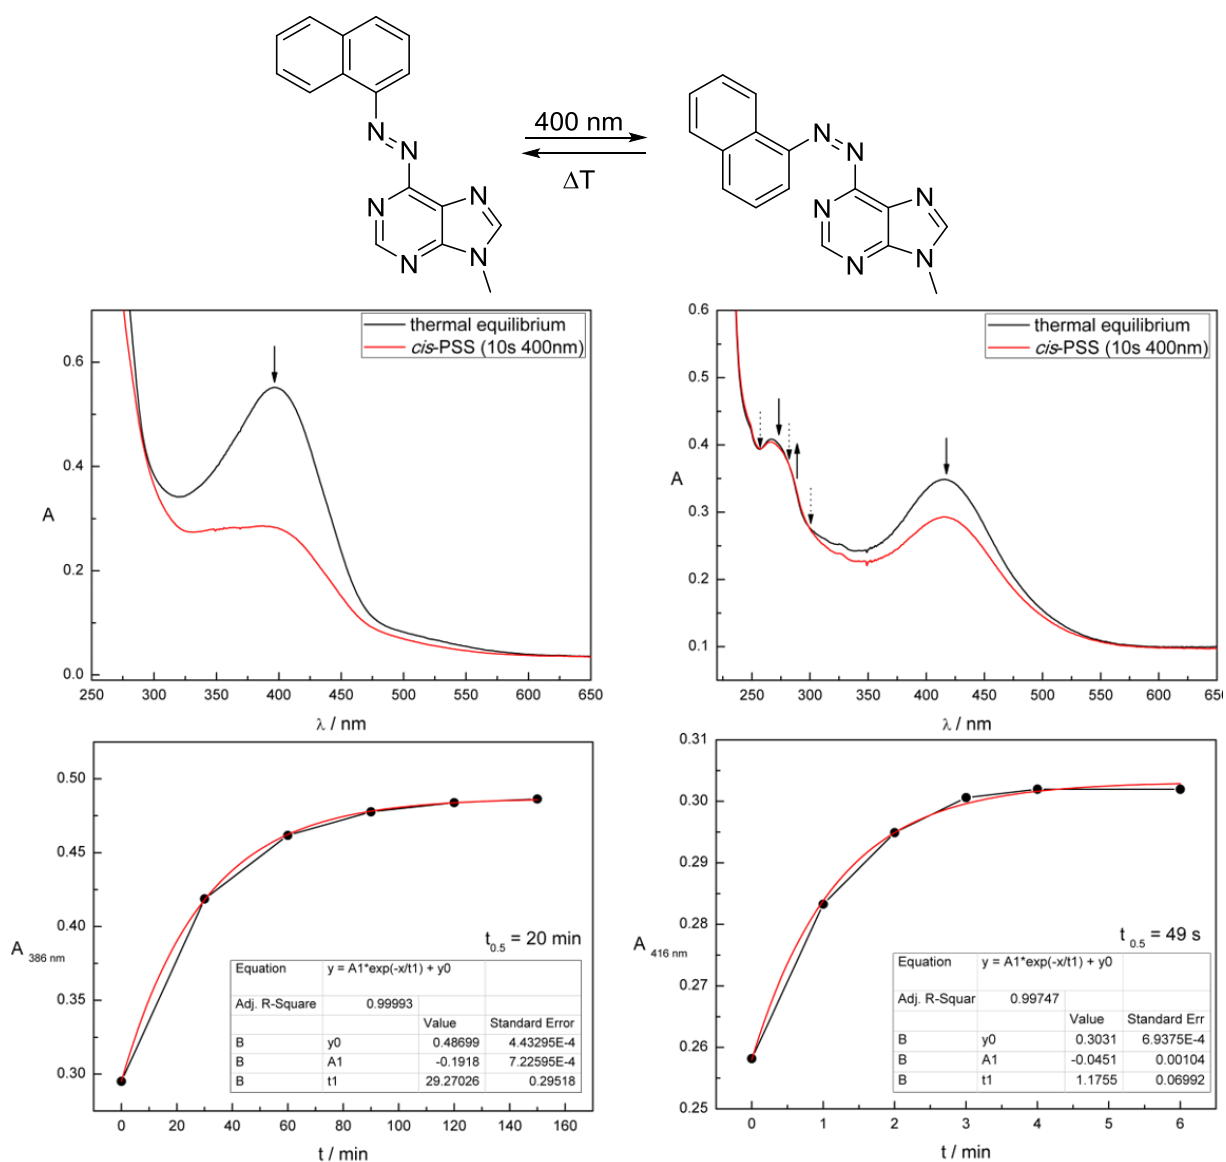

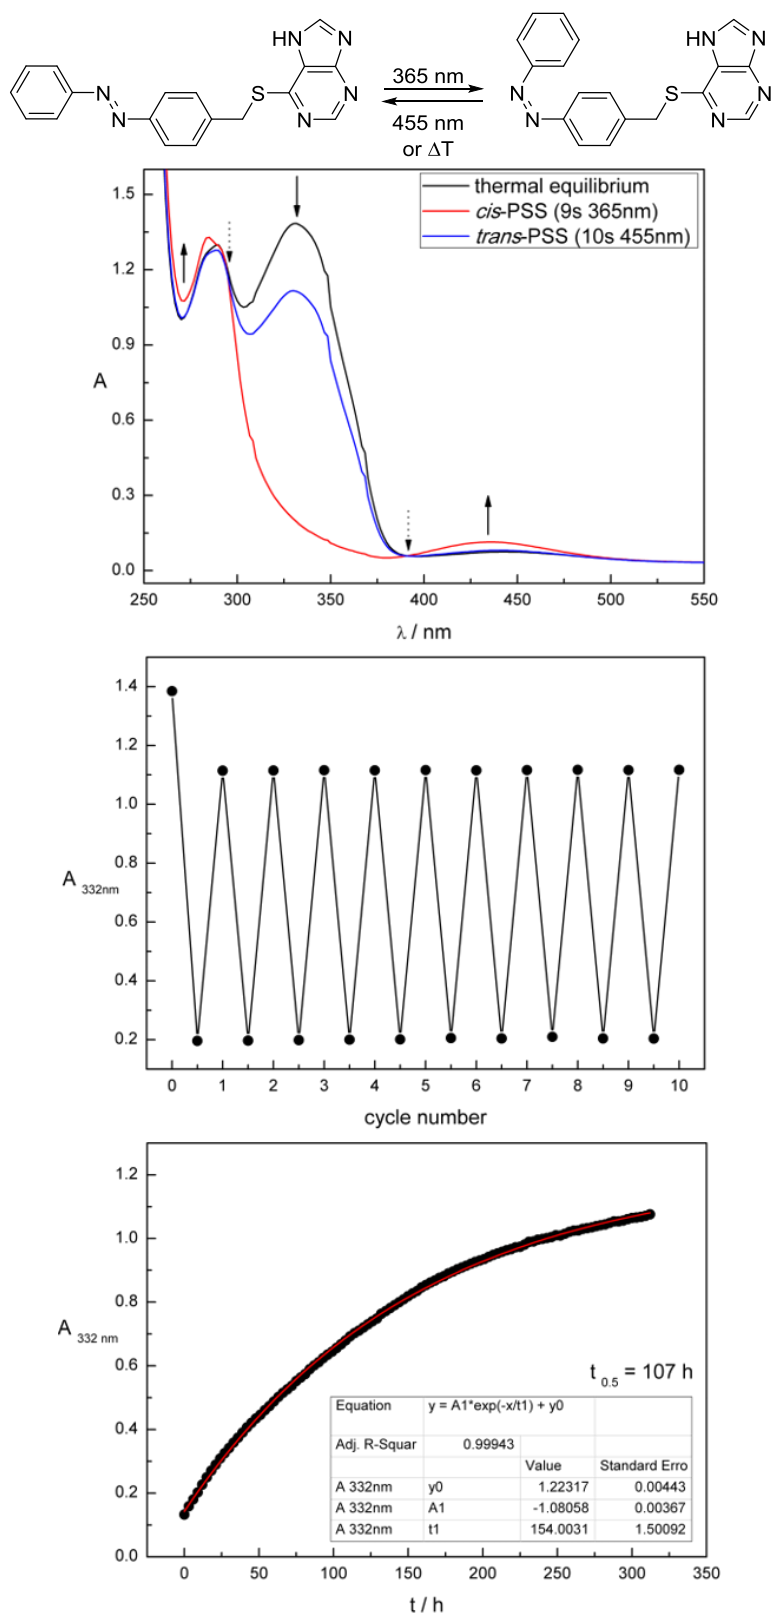

**Figure S9:** UV–vis absorption spectroscopic characterization of compound **23** measured at 50  $\mu\text{M}$  in DMSO. **Upper panel.** UV–vis absorption spectrum upon continuous irradiation with the indicated wavelengths until the PSS is reached. Black arrows indicate the changes in the absorption upon *trans*–*cis*-isomerization. Dotted black arrows indicate isosbestic points. **Middle panel.** Cycle performance. Changes in absorbance at  $\lambda_{\text{max}}$  of the *trans*-isomer were measured during alternate irradiation with the indicated wavelengths. **Lower panel.** Thermal half-life determined at  $\lambda_{\text{max}}$  of the *trans*-isomer.

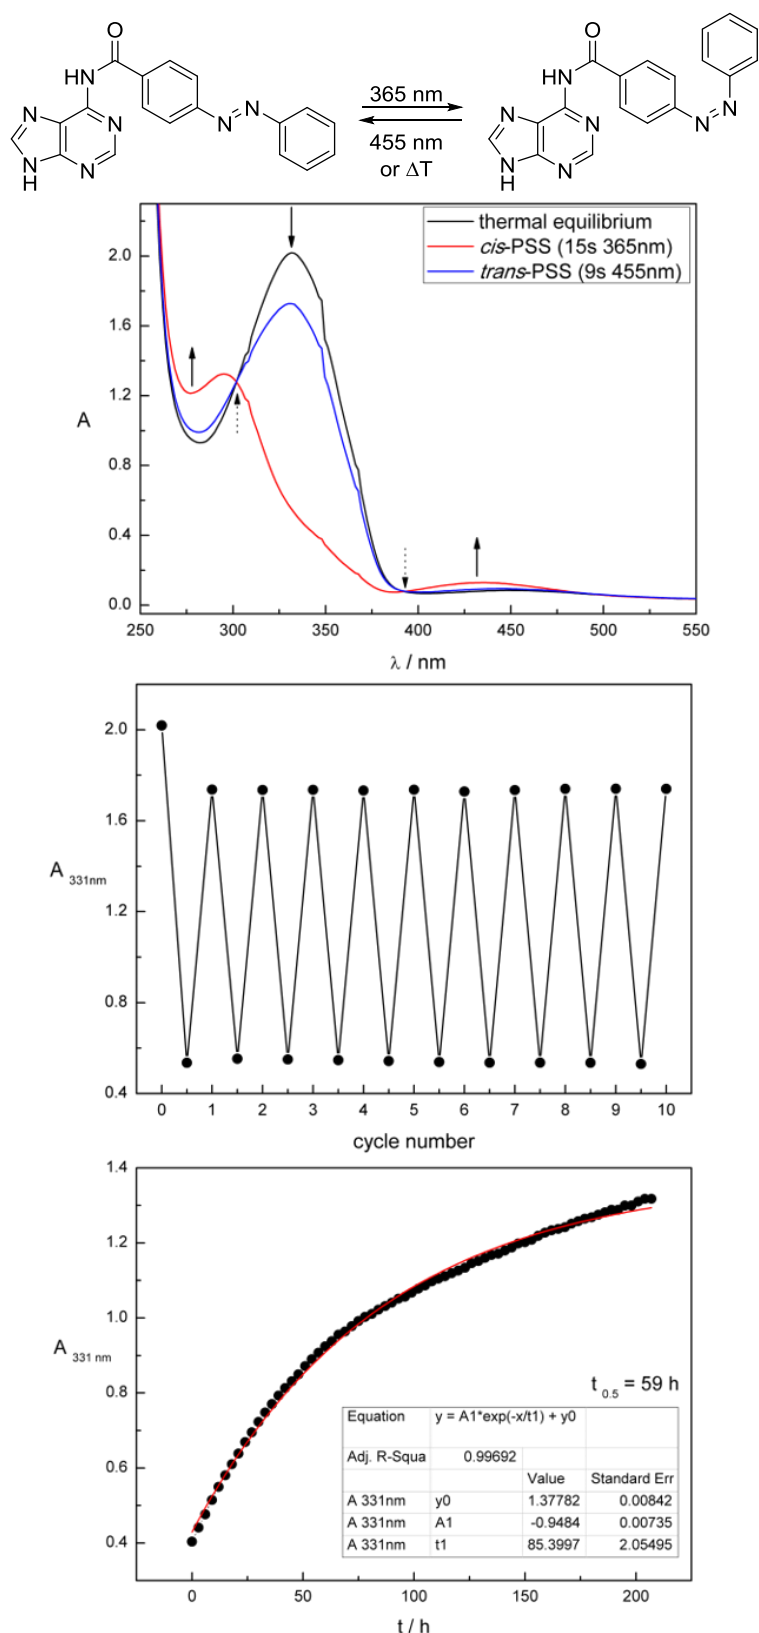

**Figure S10:** UV-vis absorption spectroscopic characterization of compound **28** measured at 50  $\mu\text{M}$  in DMSO. **Upper panel.** UV-vis absorption spectrum upon continuous irradiation with the indicated wavelengths until the PSS is reached. Black arrows indicate the changes in the absorption upon *trans*-*cis*-isomerization. Dotted black arrows indicate isosbestic points. **Middle panel.** Cycle performance. Changes in absorption at  $\lambda_{\text{max}}$  of the *trans*-isomer were measured during alternate

irradiation with the indicated wavelengths. **Lower panel.** Thermal half-life determined at  $\lambda_{\max}$  of the *trans*-isomer.

#### Tabular summarized photochemical data

**Table S1:** Photochemical properties of azobenzene-based serotonin 5-HT<sub>3</sub>R antagonists determined at 50  $\mu$ M in DMSO. Cpd = Compound. PSS-distribution determined by <sup>a</sup>NMR, <sup>b</sup>analytical HPLC measurement of a preirradiated sample at 20 °C.

| Entry | Compound   | $\lambda_{\max}$<br><i>trans</i> -isomer<br>[nm] | $\lambda_{\max}$<br><i>cis</i> -isomer<br>[nm] | isosbestic points<br>[nm] | THL     |
|-------|------------|--------------------------------------------------|------------------------------------------------|---------------------------|---------|
| 1     | <b>5a</b>  | 355                                              | 452                                            | 268, 415                  | 21 min  |
| 2     | <b>5b</b>  | 348                                              | 455                                            | 266, 411                  | 3.4 h   |
| 3     | <b>12a</b> | 343                                              | -                                              | -                         | 3.5 min |
| 4     | <b>12b</b> | 319                                              | -                                              | -                         | -       |
| 5     | <b>16a</b> | 309                                              | -                                              | 275, 430, 489             | 37 s    |
| 6     | <b>16b</b> | 346                                              | -                                              | 279, 432, 459             | 46 min  |
| 7     | <b>16c</b> | 404                                              | -                                              | 309                       | 15 min  |
| 8     | <b>16d</b> | 386                                              | -                                              | 309                       | 20 min  |
| 9     | <b>23</b>  | 332                                              | 437                                            | 289, 391                  | 107 h   |
| 10    | <b>28</b>  | 331                                              | 434                                            | 302, 392                  | 59 h    |

**Table S2:** Photochemical properties of azobenzene-based serotonin 5-HT<sub>3</sub>R antagonists determined at 50  $\mu$ M in phosphate buffer + 0.1% DMSO.

| Entry | Compound   | $\lambda_{\max}$<br><i>trans</i> -isomer<br>[nm] | $\lambda_{\max}$<br><i>cis</i> -isomer<br>[nm] | isosbestic points<br>[nm] | THL    |
|-------|------------|--------------------------------------------------|------------------------------------------------|---------------------------|--------|
| 1     | <b>16a</b> | 315                                              | -                                              | 243, 267, 280, 438, 466   | 9 s    |
| 2     | <b>16b</b> | 352                                              | -                                              | 289, 431, 470             | 10 min |
| 3     | <b>16c</b> | 414                                              | -                                              | 306                       | 52 s   |
| 4     | <b>16d</b> | 416                                              | -                                              | 314                       | 49 s   |

**Table S3:** Determination of the photostationary states for the thermally more stable compounds **23** and **28** (at 50  $\mu$ M in DMSO) using analytical HPLC at the isosbestic point at 20 °C.

| Entry | Compound  | PSS-distribution (50 $\mu$ M in DMSO at 20 °C)     |
|-------|-----------|----------------------------------------------------|
| 1     | <b>23</b> | 91% <i>cis</i> (365 nm); 81% <i>trans</i> (455 nm) |
| 2     | <b>28</b> | 69% <i>cis</i> (365 nm); 84% <i>trans</i> (455 nm) |

# <sup>1</sup>H and <sup>13</sup>C NMR spectra

Compound **5a** (DMSO-*d*<sub>6</sub>)

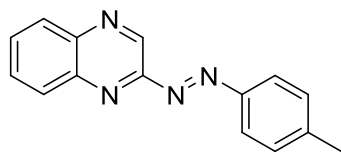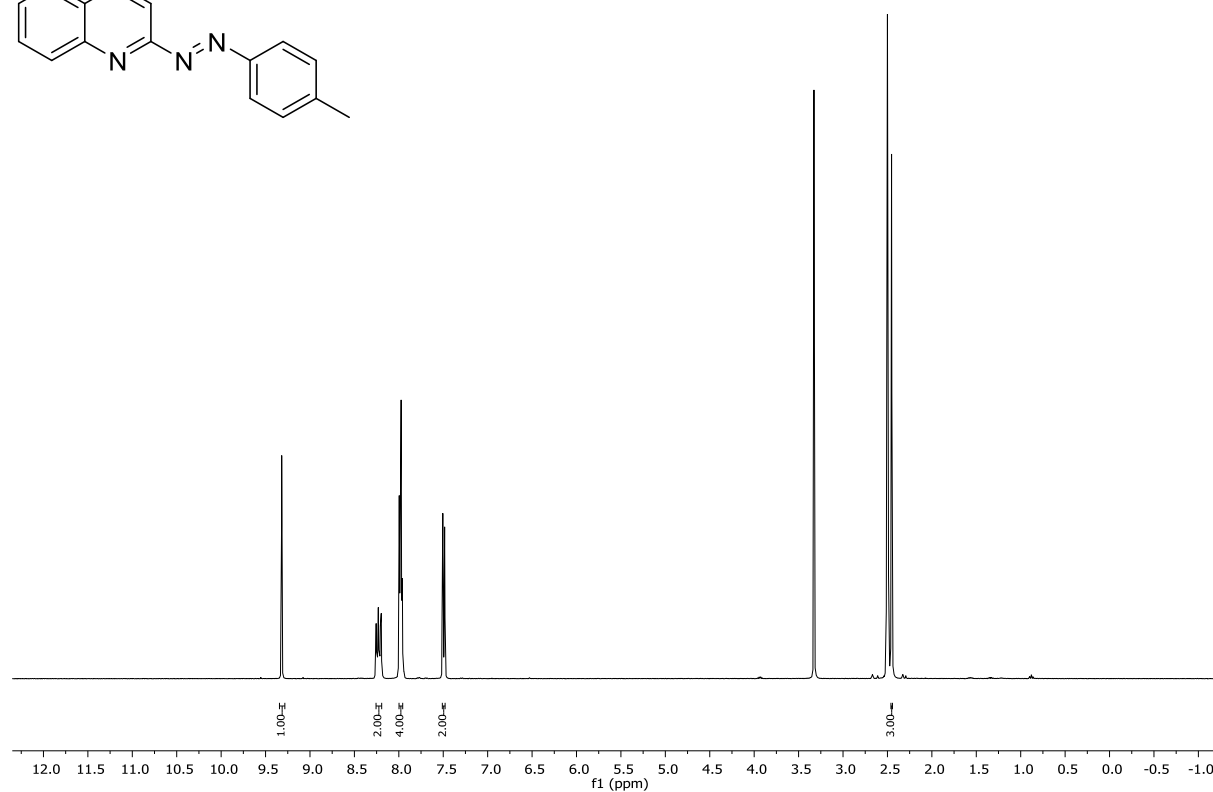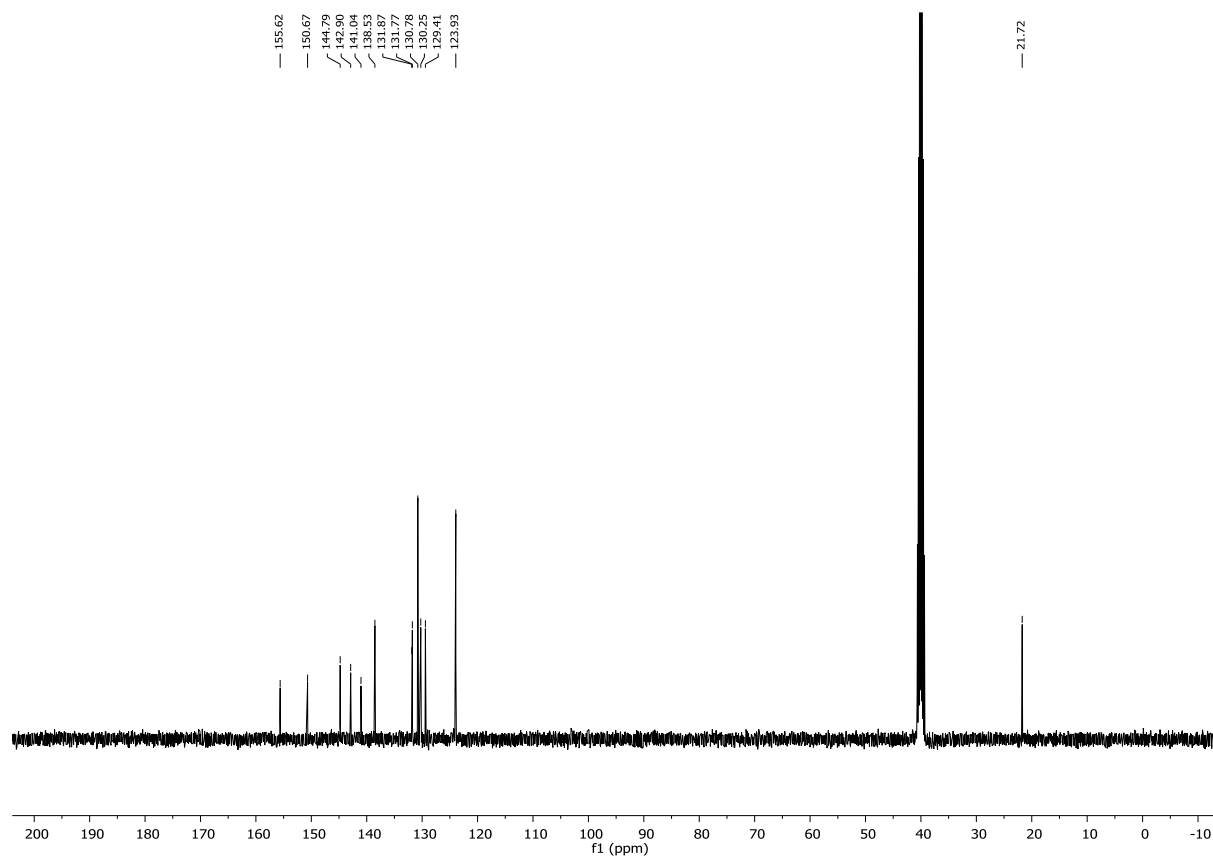

<sup>1</sup>H and <sup>13</sup>C NMR spectra.

Compound **5b** (DMSO-*d*<sub>6</sub>)

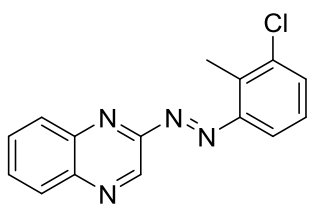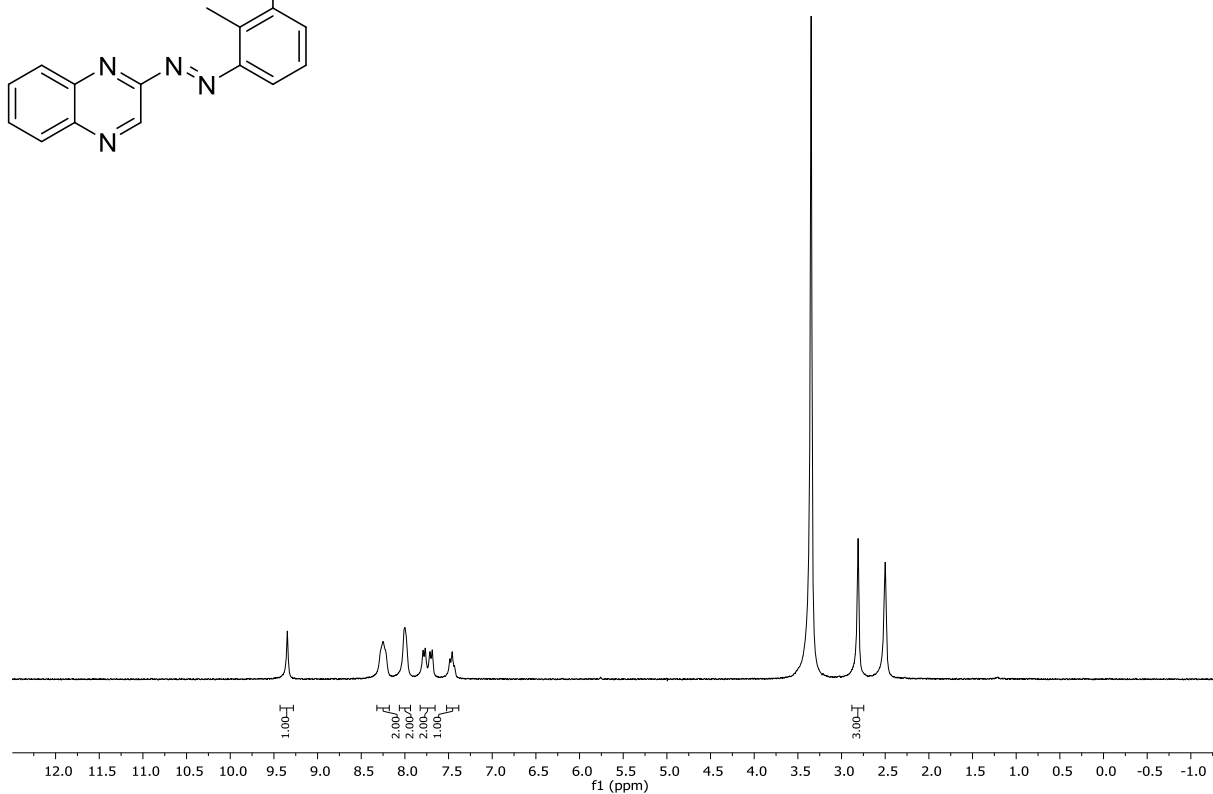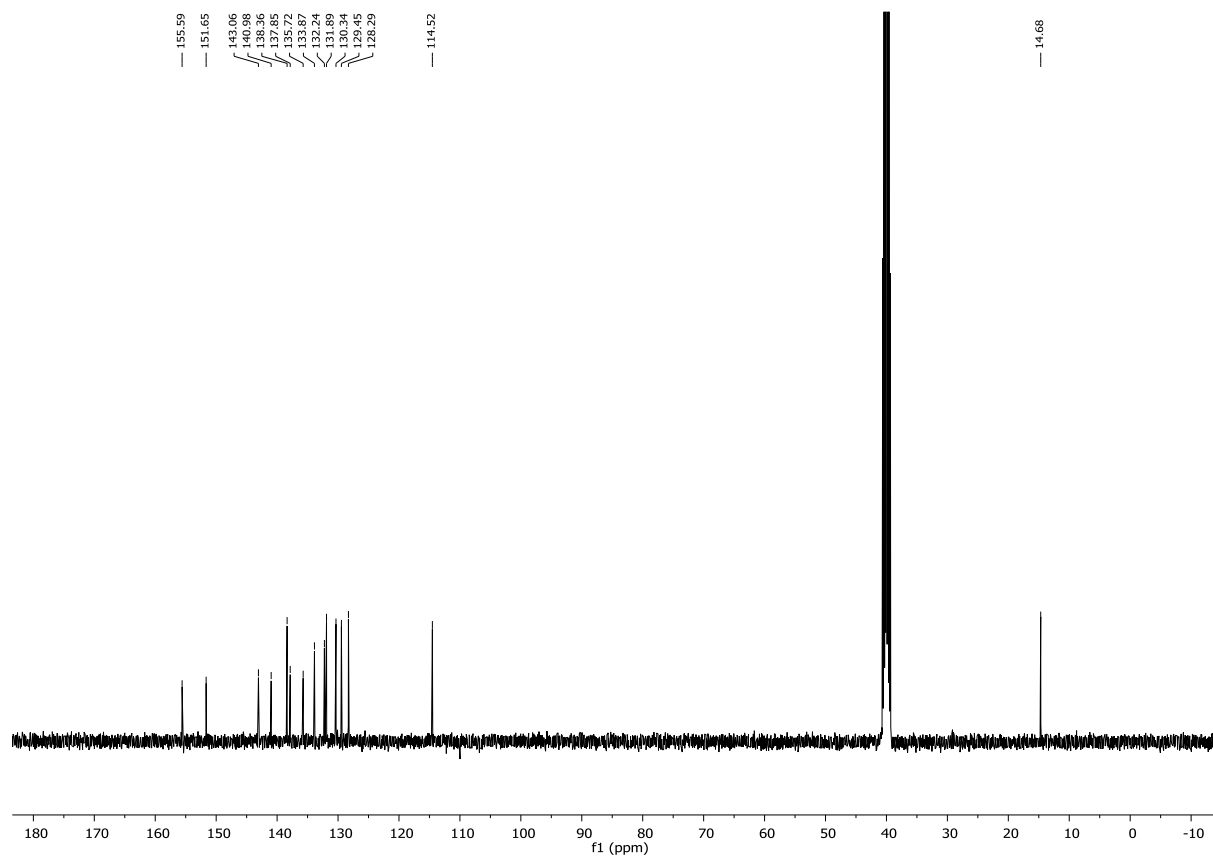

**$^1\text{H}$  and  $^{13}\text{C}$  NMR spectra.**

Compound **12a** ( $^1\text{H}$  DMSO- $d_6$ ,  $^{13}\text{C}$   $\text{CDCl}_3$ )

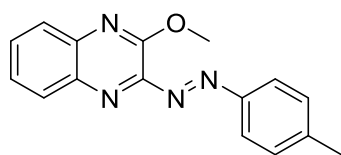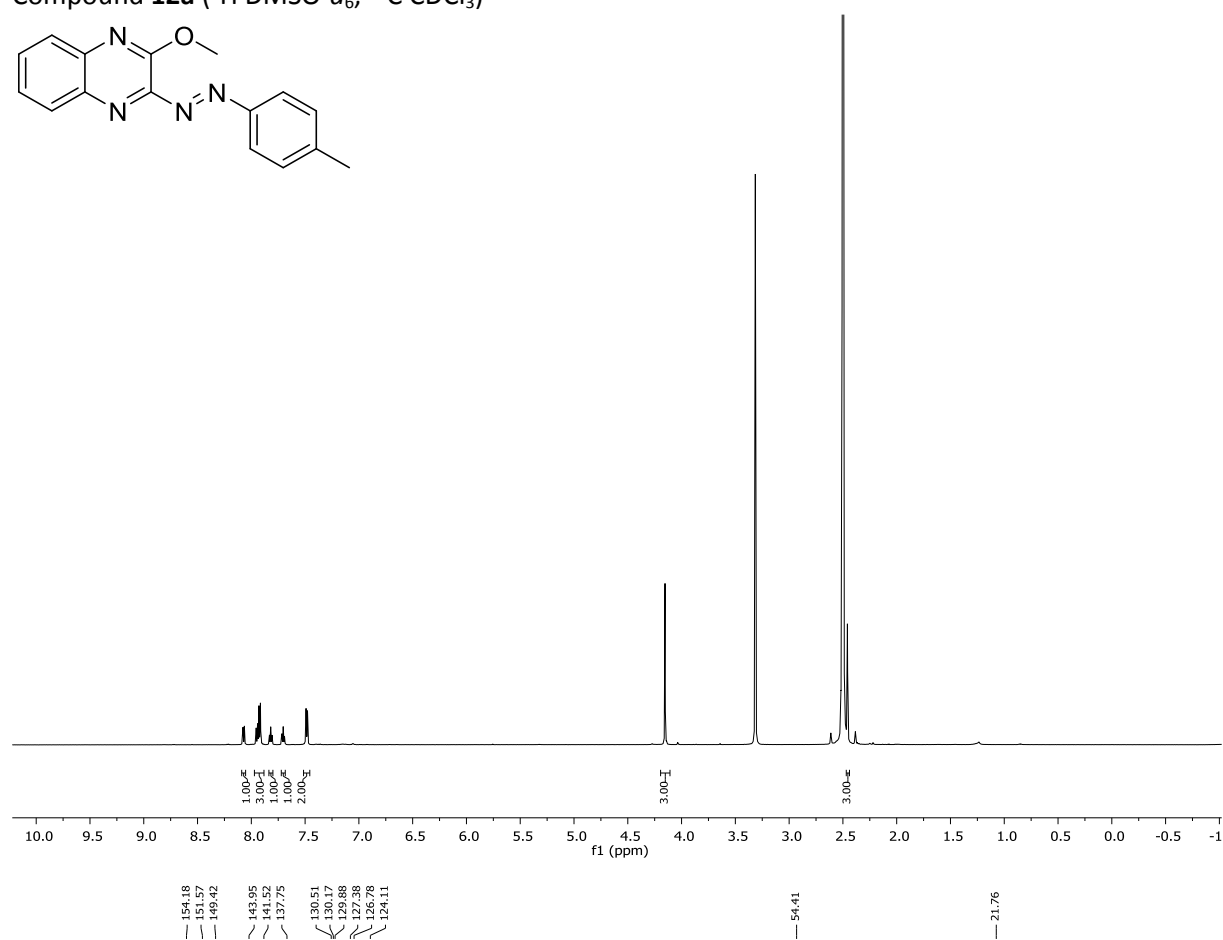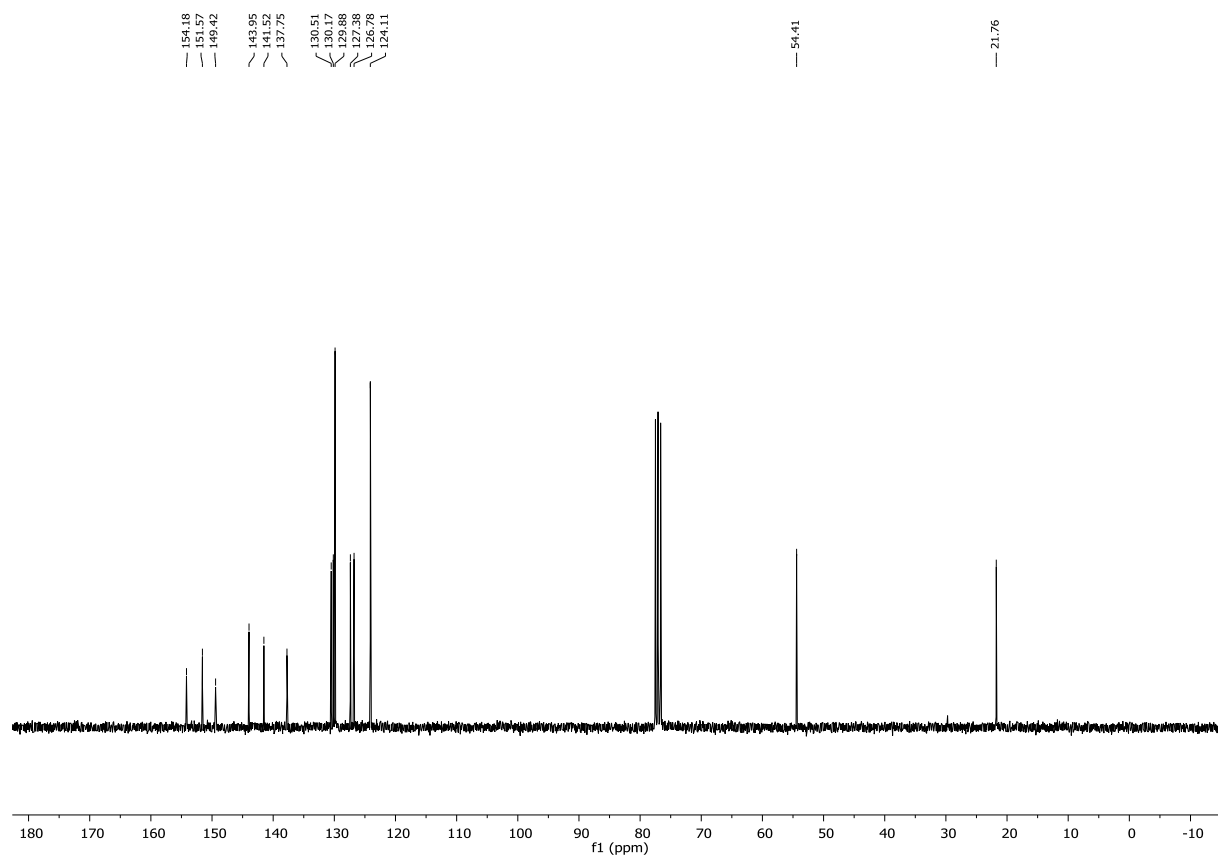



<sup>1</sup>H and <sup>13</sup>C NMR spectra.

Compound **12b** (DMSO-*d*<sub>6</sub>)

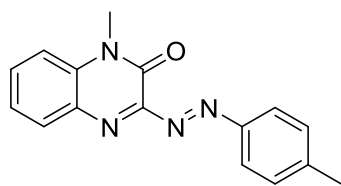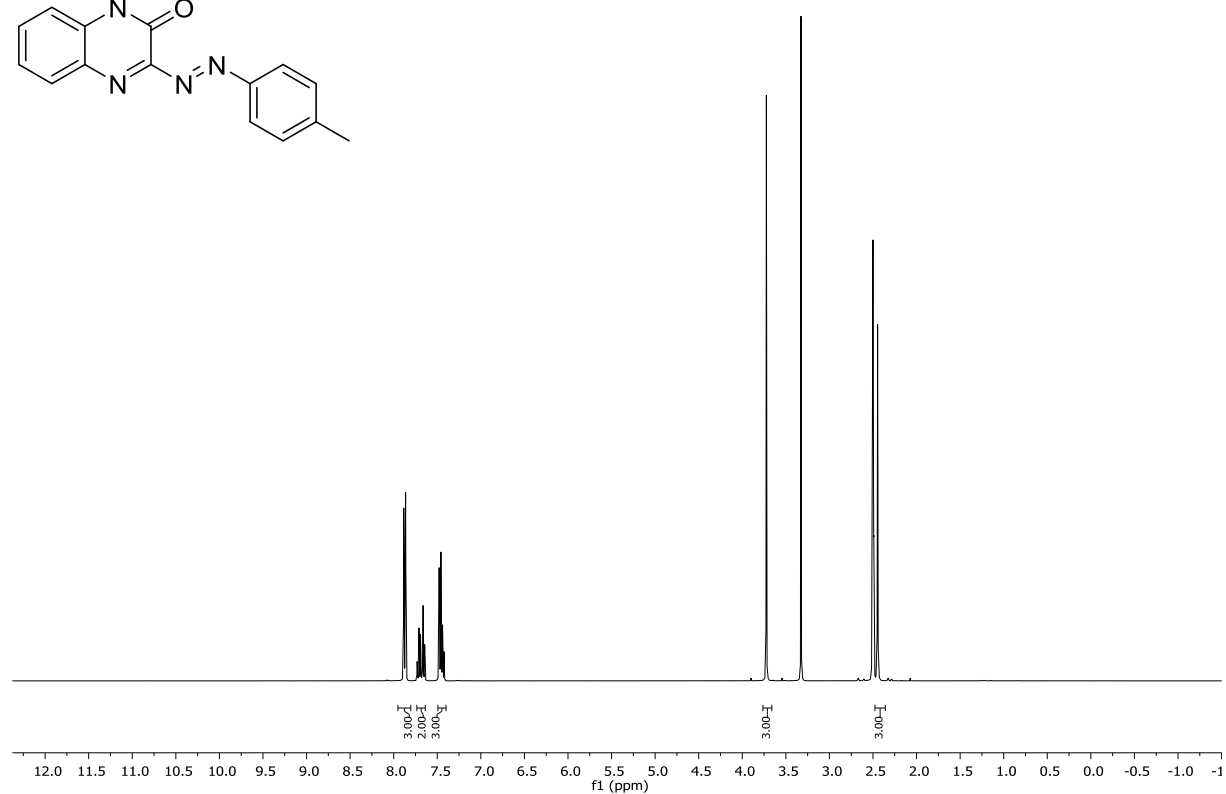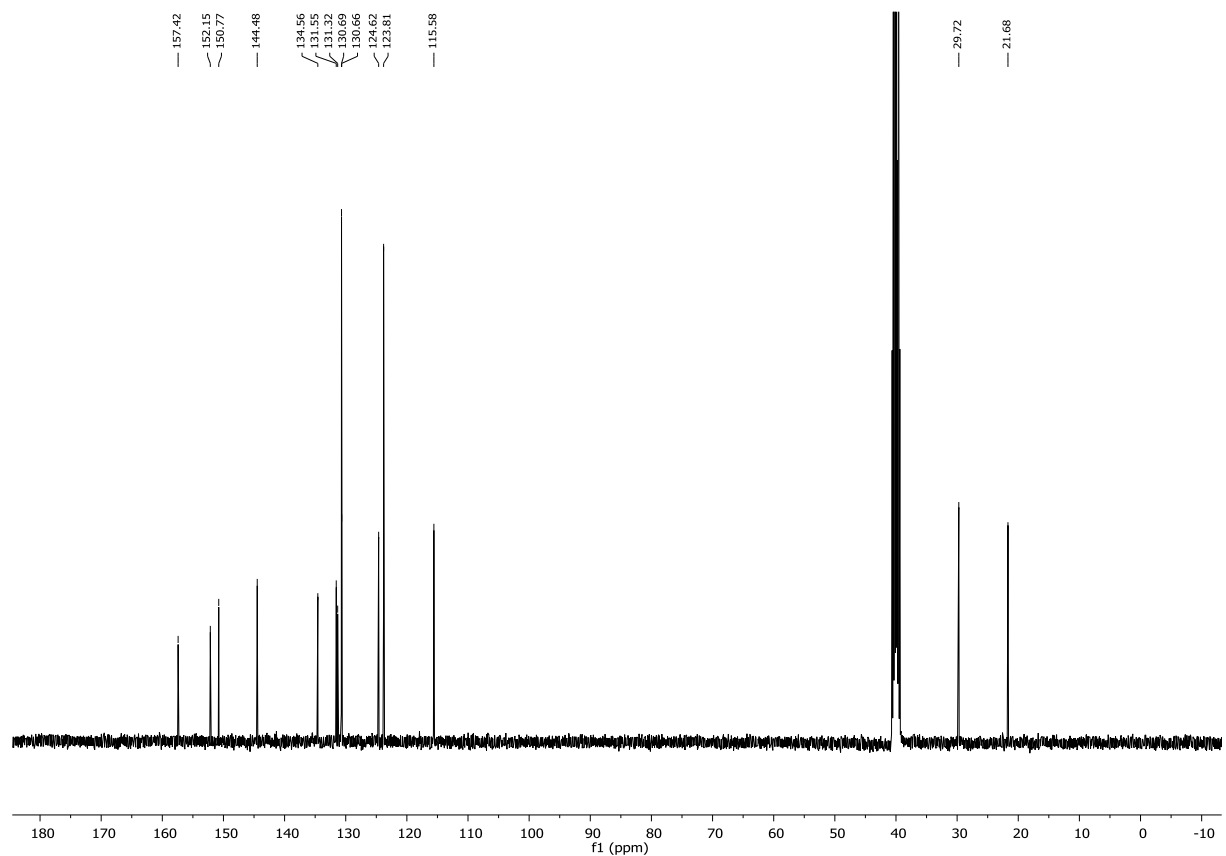

<sup>1</sup>H and <sup>13</sup>C NMR spectra.

Compound **16a** (DMSO-*d*<sub>6</sub>)

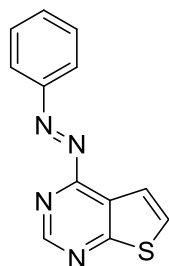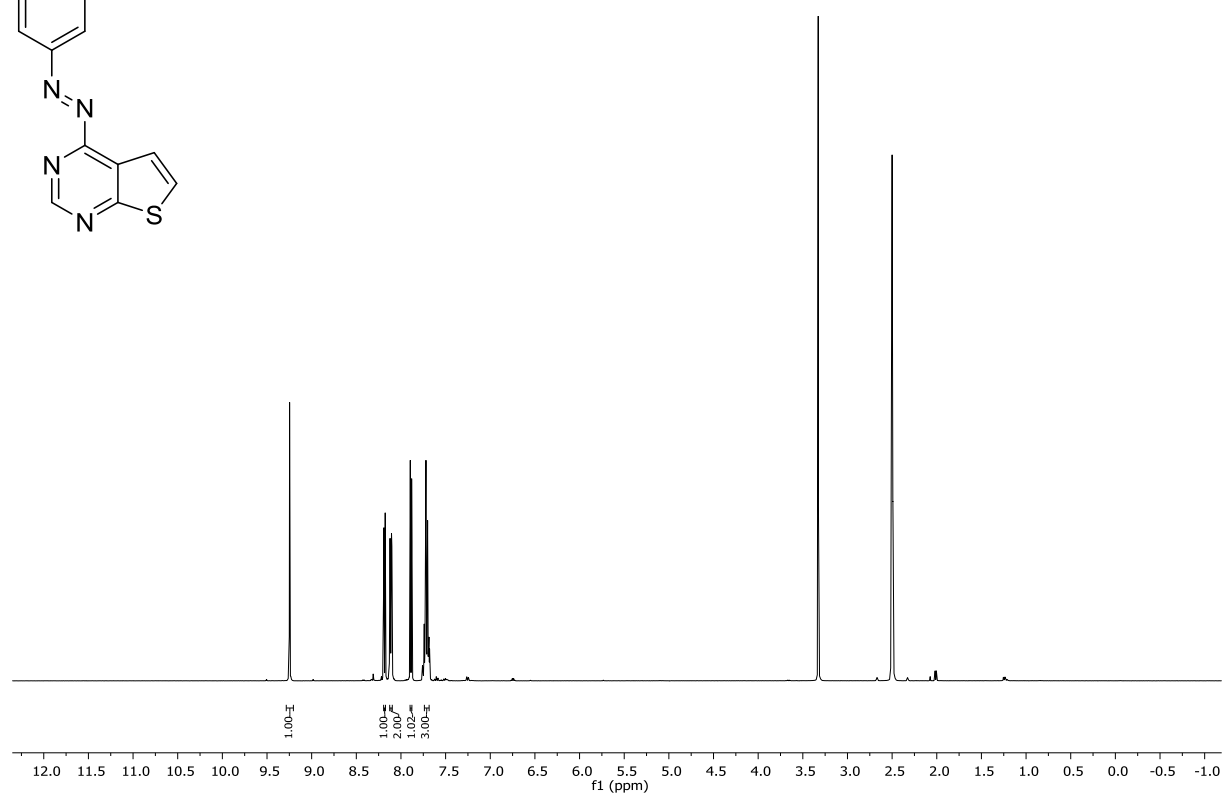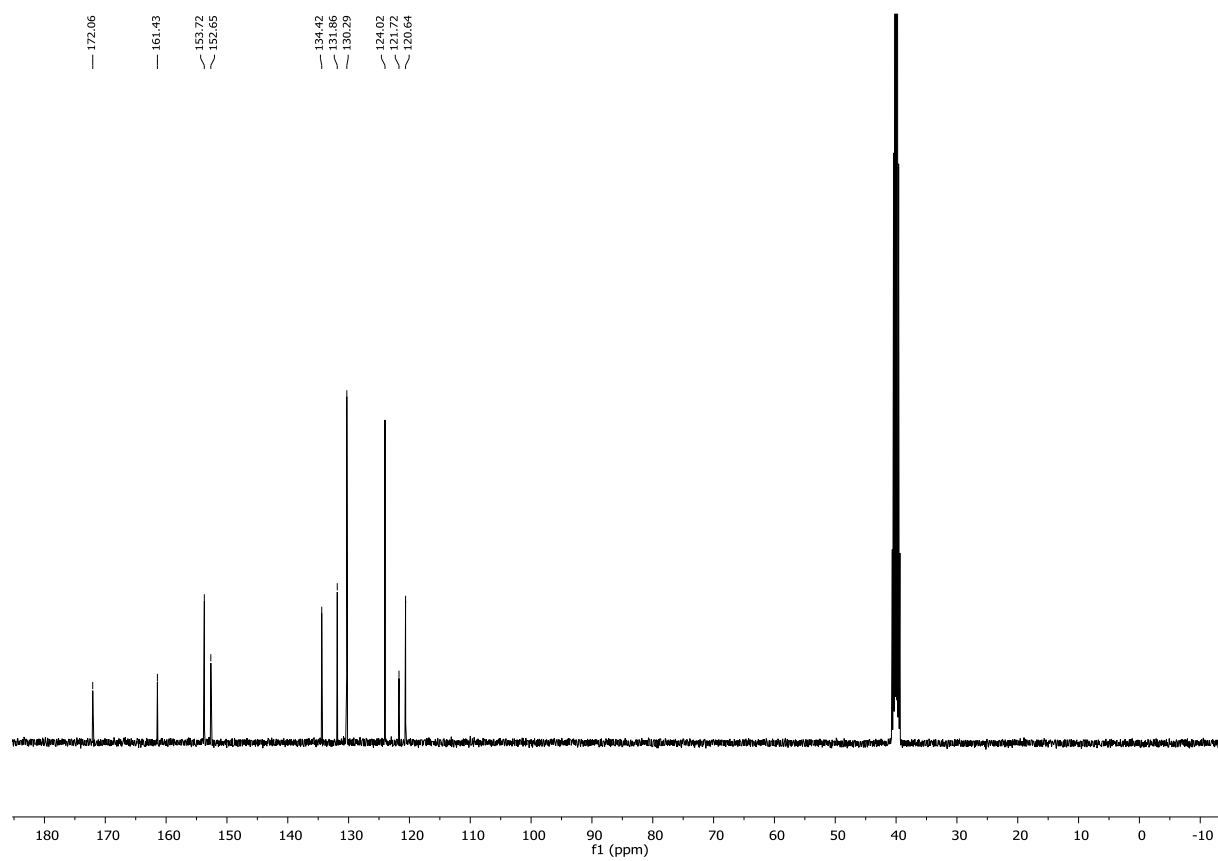

<sup>1</sup>H and <sup>13</sup>C NMR spectra.

Compound **16b** (DMSO-*d*<sub>6</sub>)

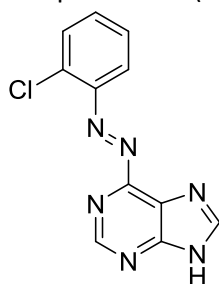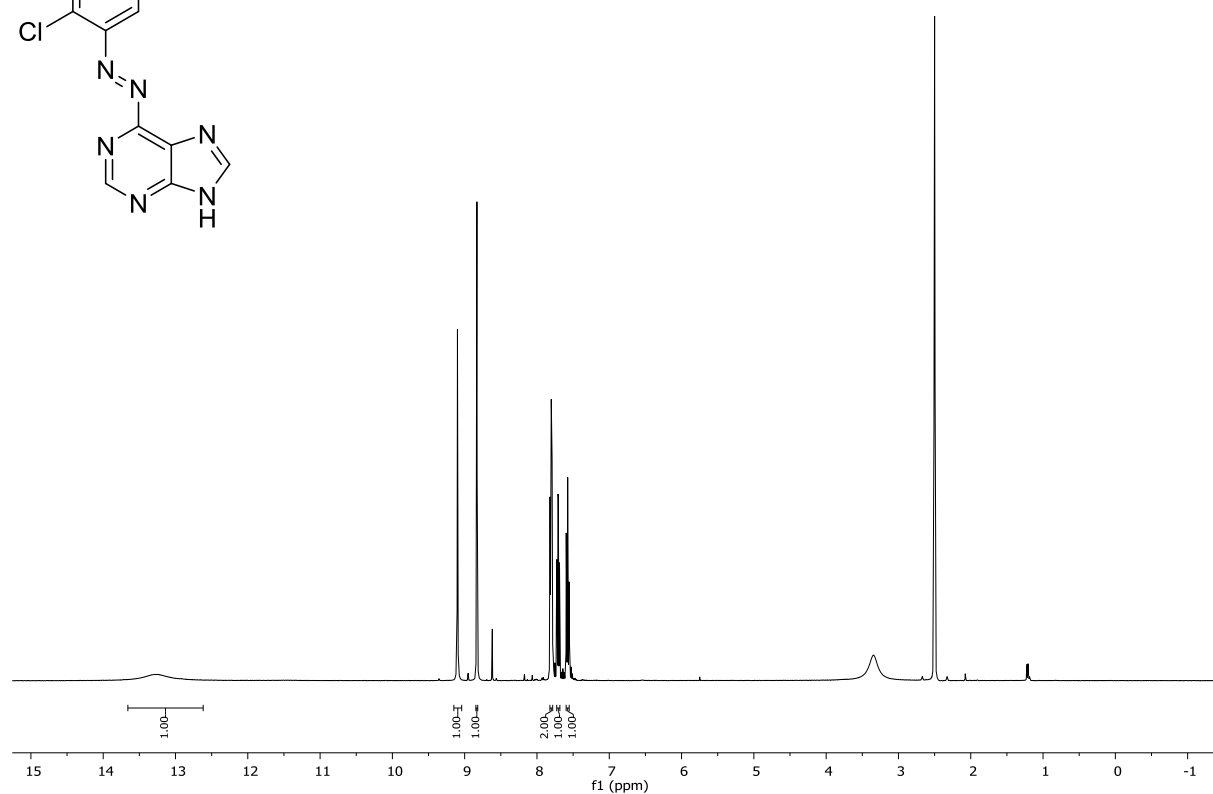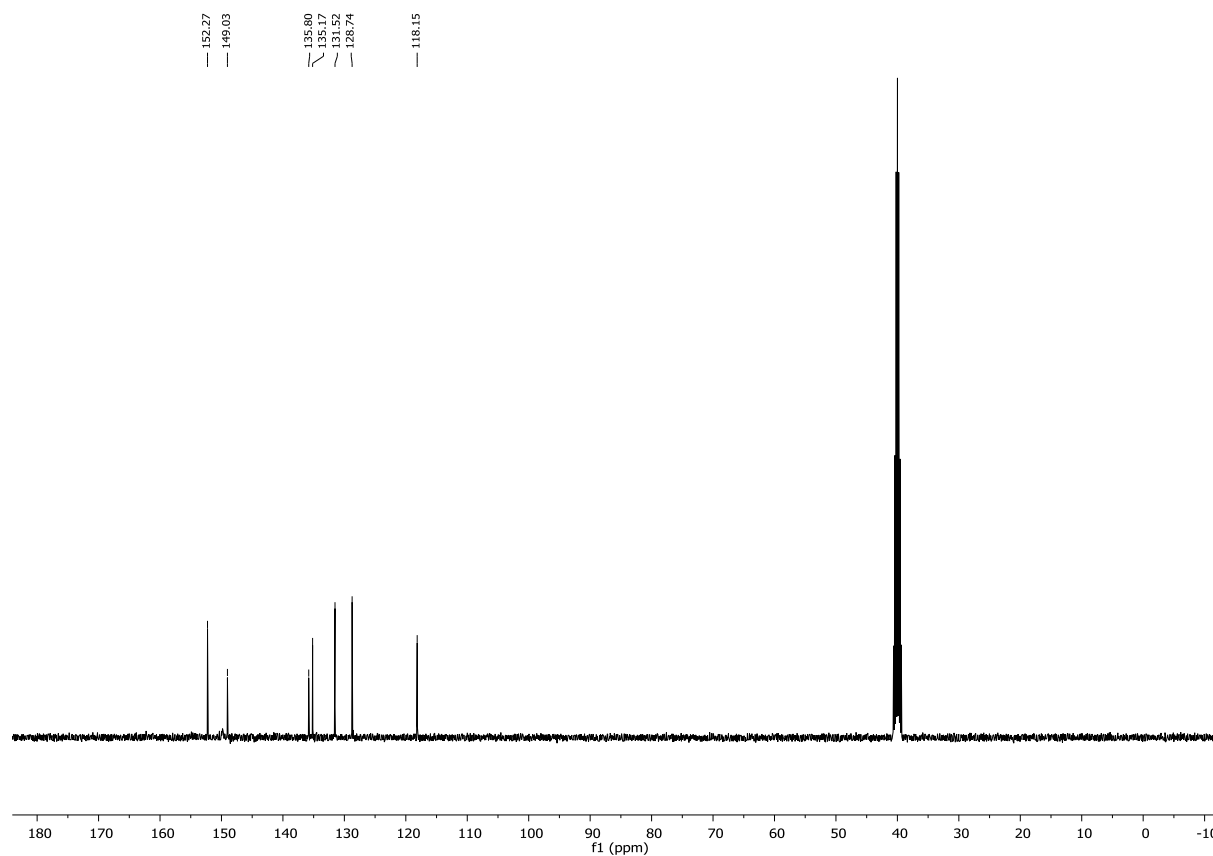

<sup>1</sup>H and <sup>13</sup>C NMR spectra.

Compound **16c** (DMSO-*d*<sub>6</sub>)

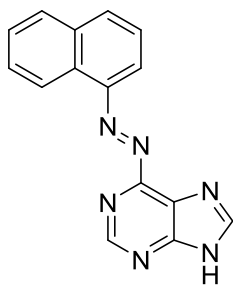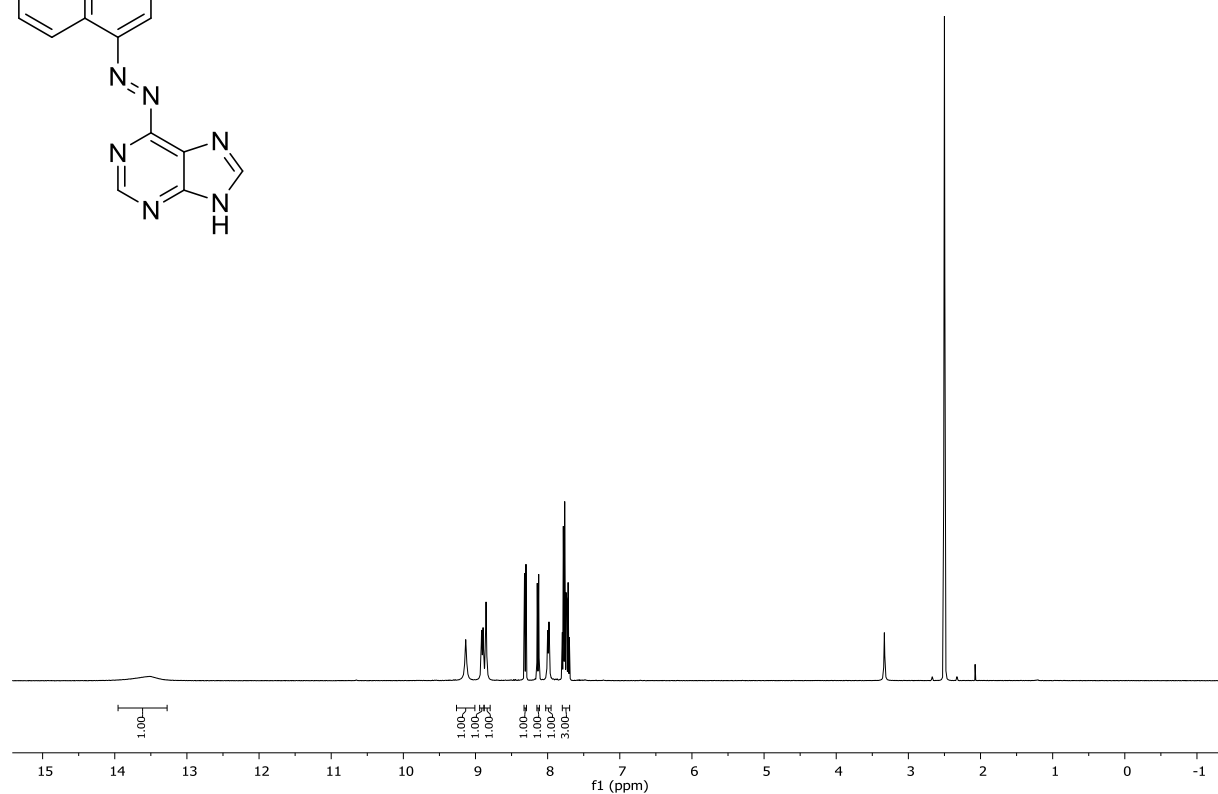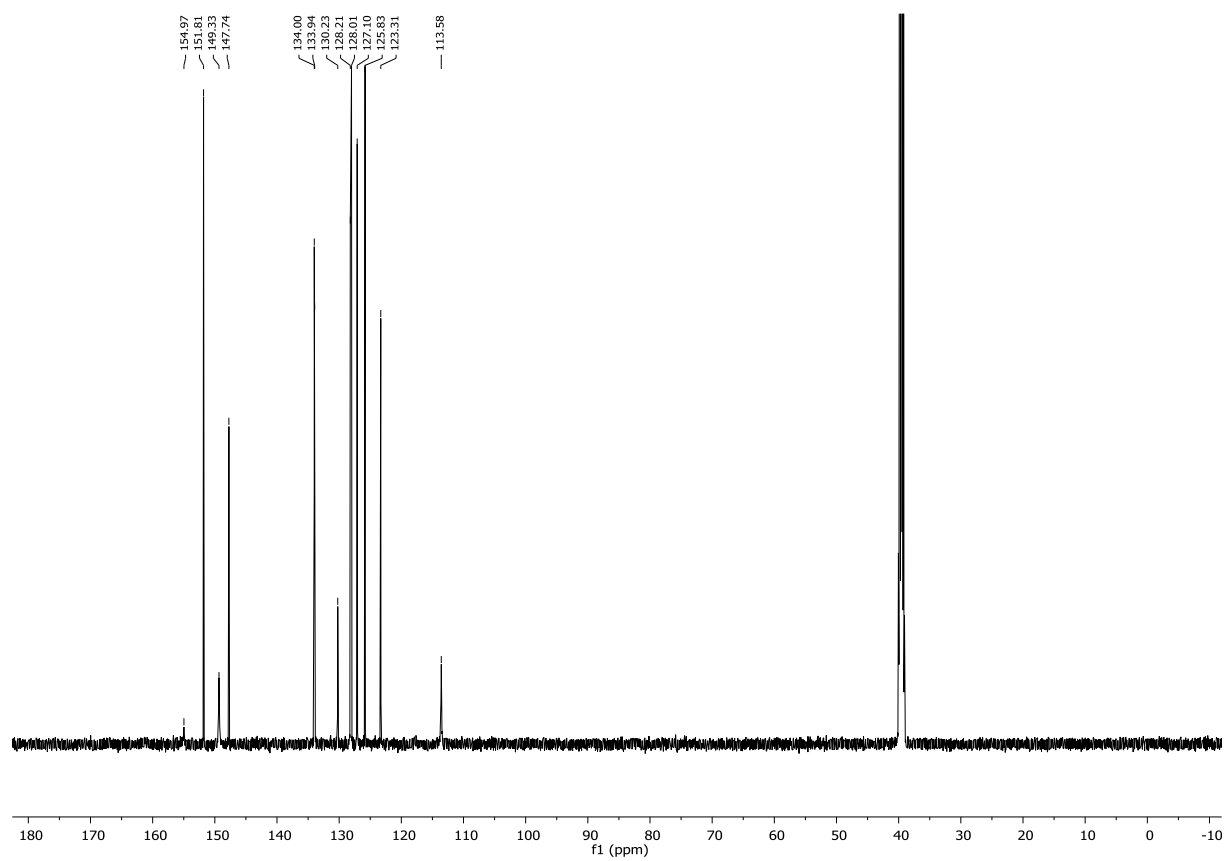

<sup>1</sup>H and <sup>13</sup>C NMR spectra.

Compound **16d** (CDCl<sub>3</sub>)

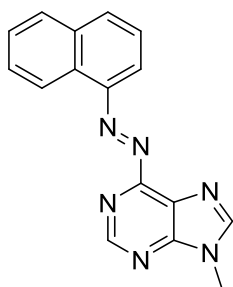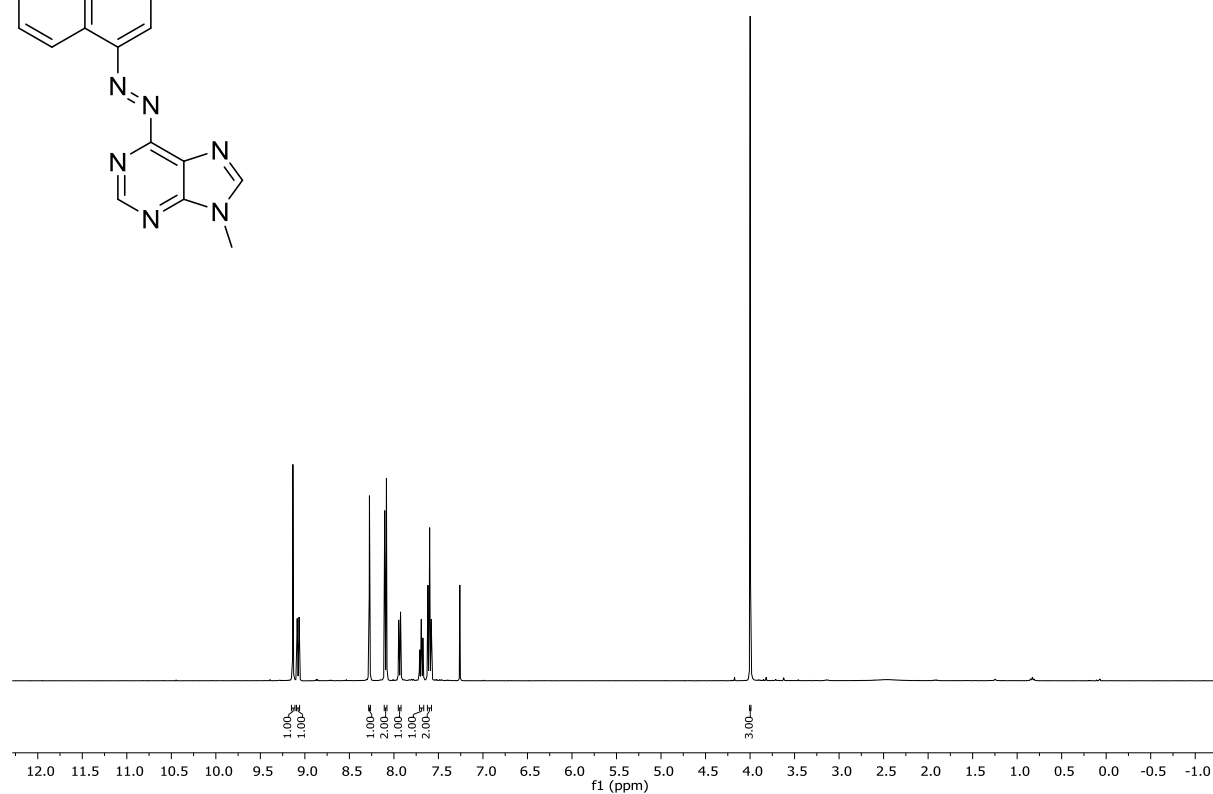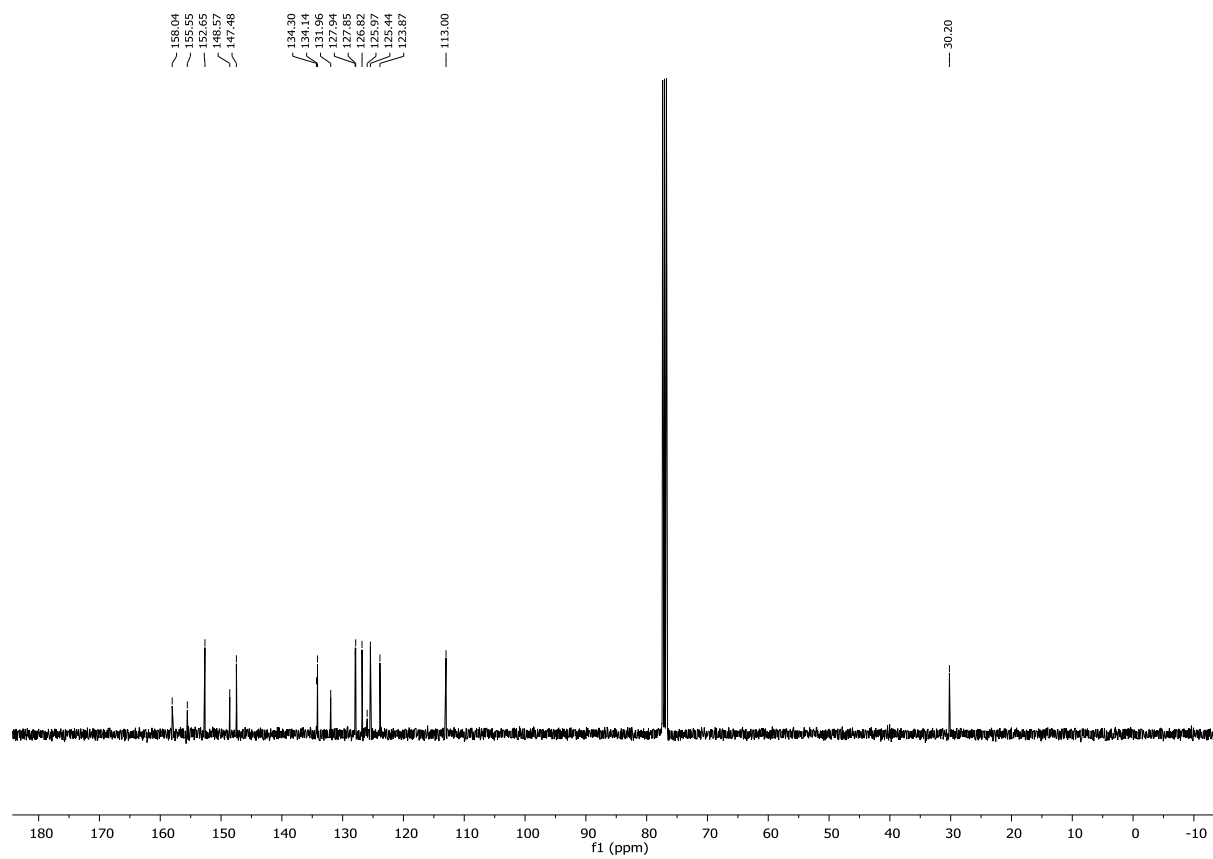

<sup>1</sup>H and <sup>13</sup>C NMR spectra.

Compound **23** (DMSO-*d*<sub>6</sub>)

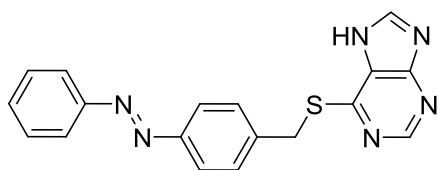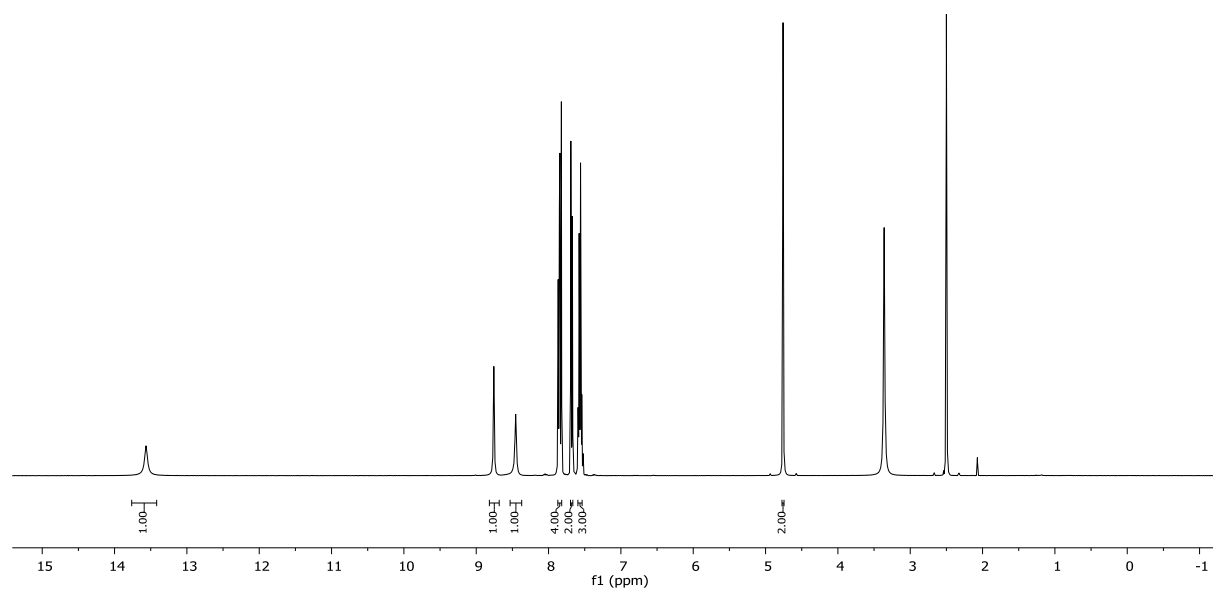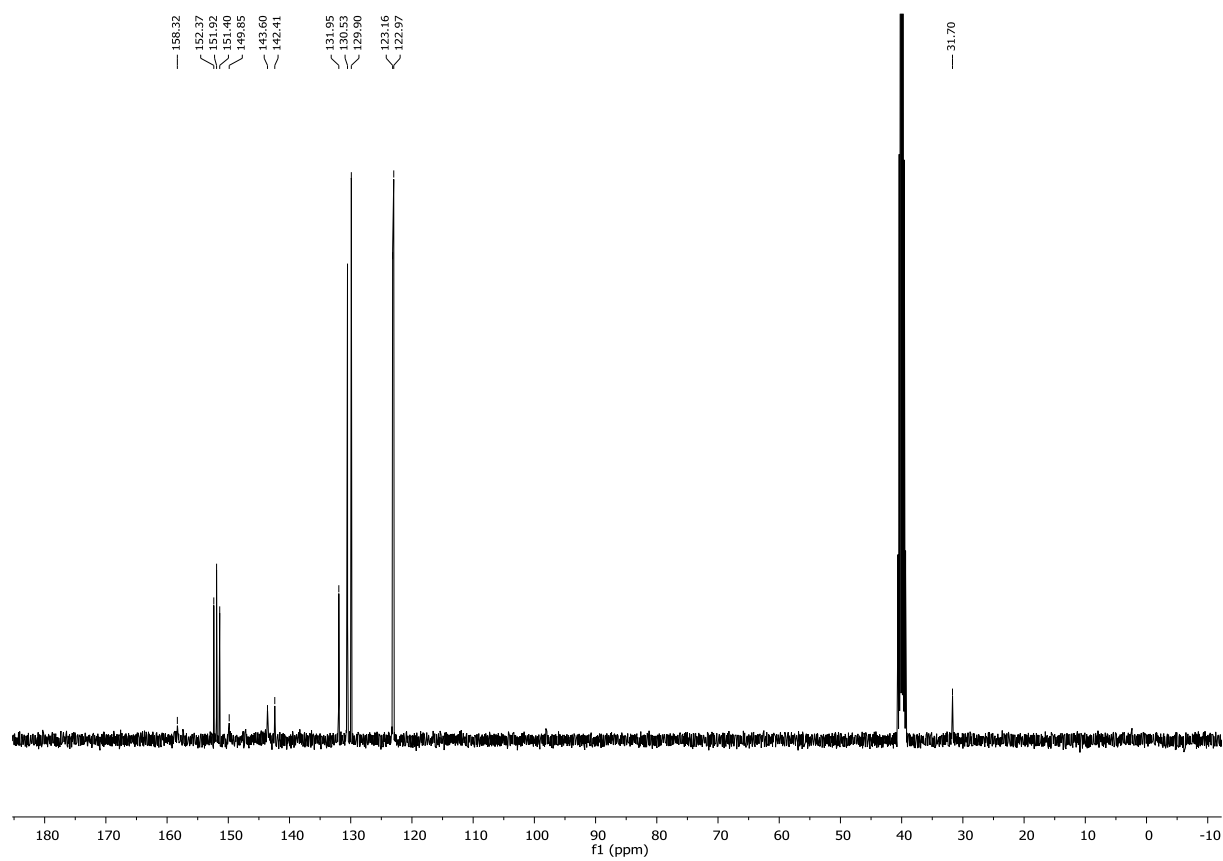

$^1\text{H}$  and  $^{13}\text{C}$  NMR spectra.

Compound **28** ( $\text{DMSO}-d_6$ )

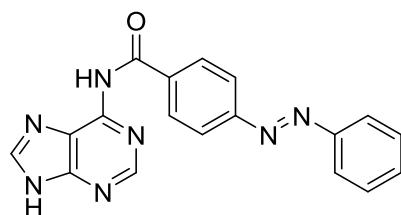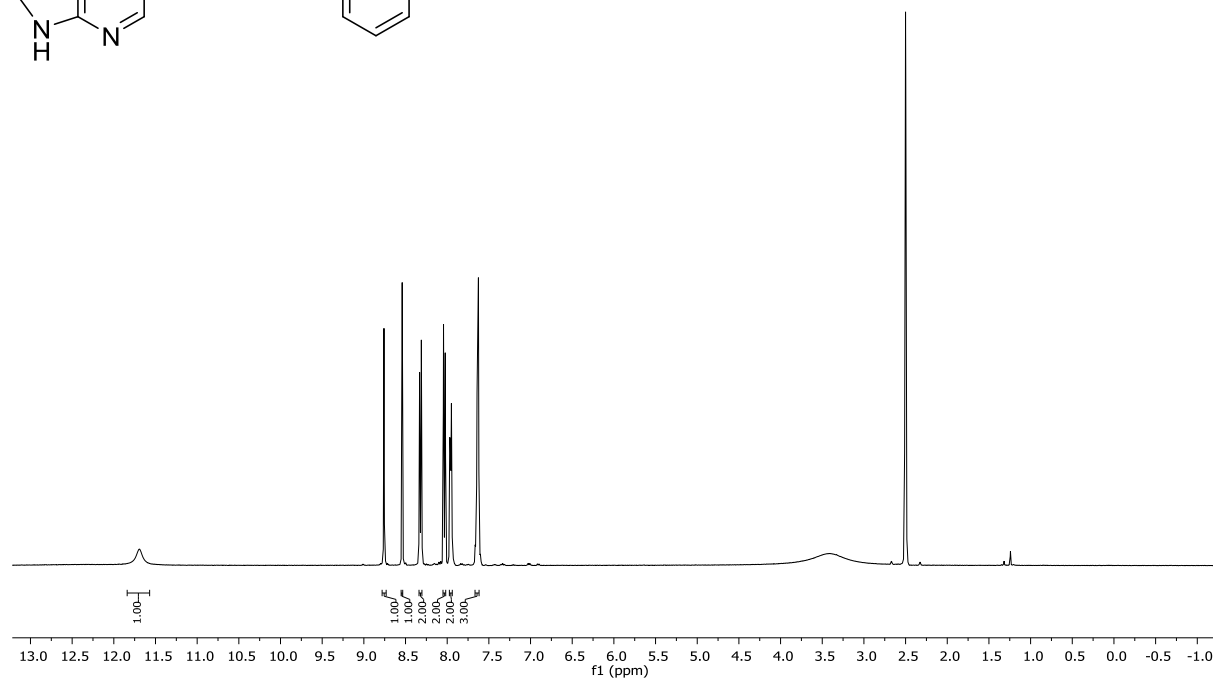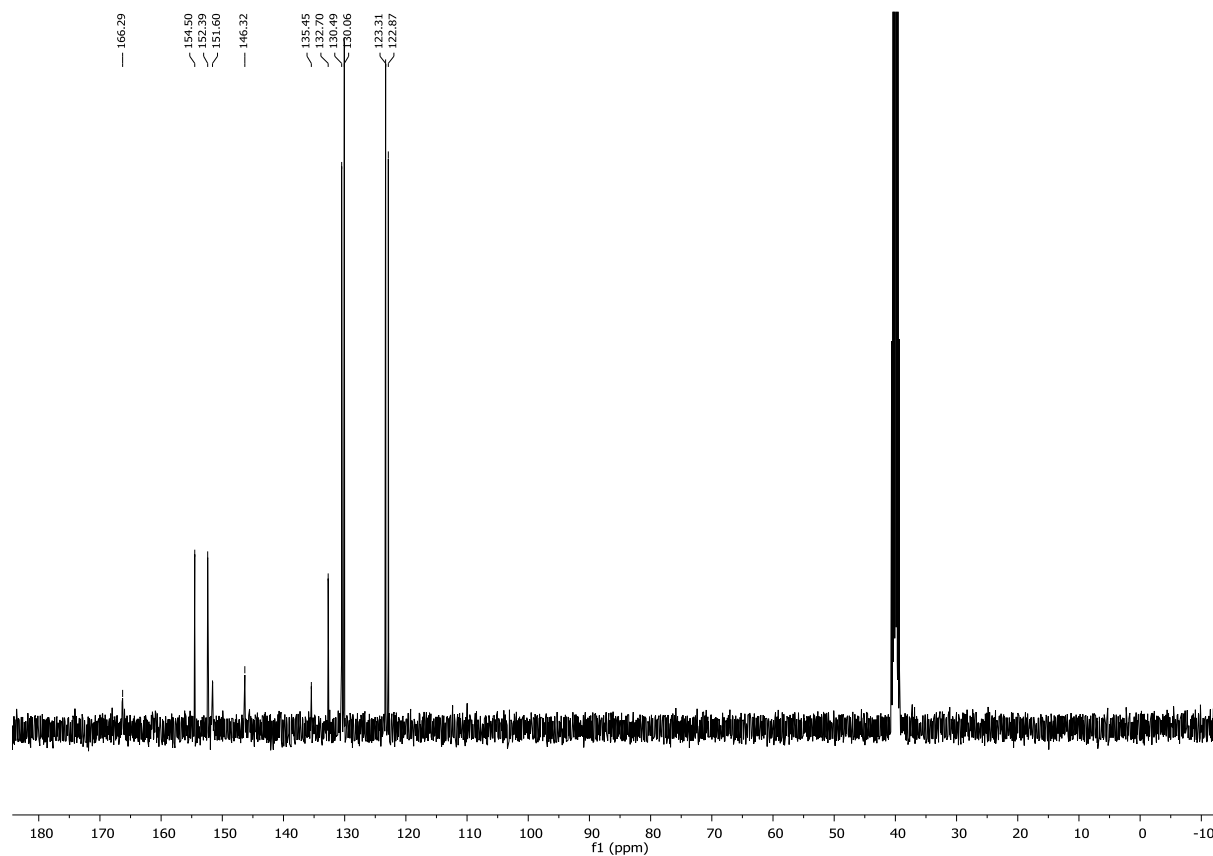

## X-ray structures

### Compound **12b**

**Experimental.** Single clear red plate-shaped crystals of **12b** were obtained by recrystallisation from acetone. A suitable crystal ( $0.088 \times 0.195 \times 0.309$ ) mm<sup>3</sup> was selected and mounted on a MITIGEN holder with inert oil on a SuperNova, Single source at offset/far, Atlas diffractometer. The crystal was kept at  $T = 123$  K during data collection. Using Olex2 (Dolomanov et al., 2009) [S1], the structure was solved with the ShelXT (Sheldrick, 2015) [S2] structure solution program, using the Intrinsic Phasing solution method. The model was refined with version 2016/6 of ShelXL (Sheldrick, 2015) [S3] using Least Squares minimisation.

**Crystal Data.** C<sub>16</sub>H<sub>14</sub>N<sub>4</sub>O,  $M_r = 279.31$ , triclinic P-1 (No. 2),  $a = 7.3051(5)$  Å,  $b = 9.2030(6)$  Å,  $c = 11.3965(8)$  Å,  $\alpha = 100.804(5)^\circ$ ,  $\beta = 97.060(5)^\circ$ ,  $\gamma = 113.159(6)^\circ$ ,  $V = 675.35(9)$  Å<sup>3</sup>,  $T = 123(1)$  K,  $Z = 1$   $\lambda(\text{CuK}\alpha) = 2.732$ , 395 reflections measured, 2567 unique ( $R_{\text{int}} = 0.0305$ ) which were used in all calculations. The final  $wR_2$  was 0.1266 (all data) and  $R_1$  was 0.0522 ( $I > 2(I)$ ).

Cambridge Structural Database CCDC: 1890055

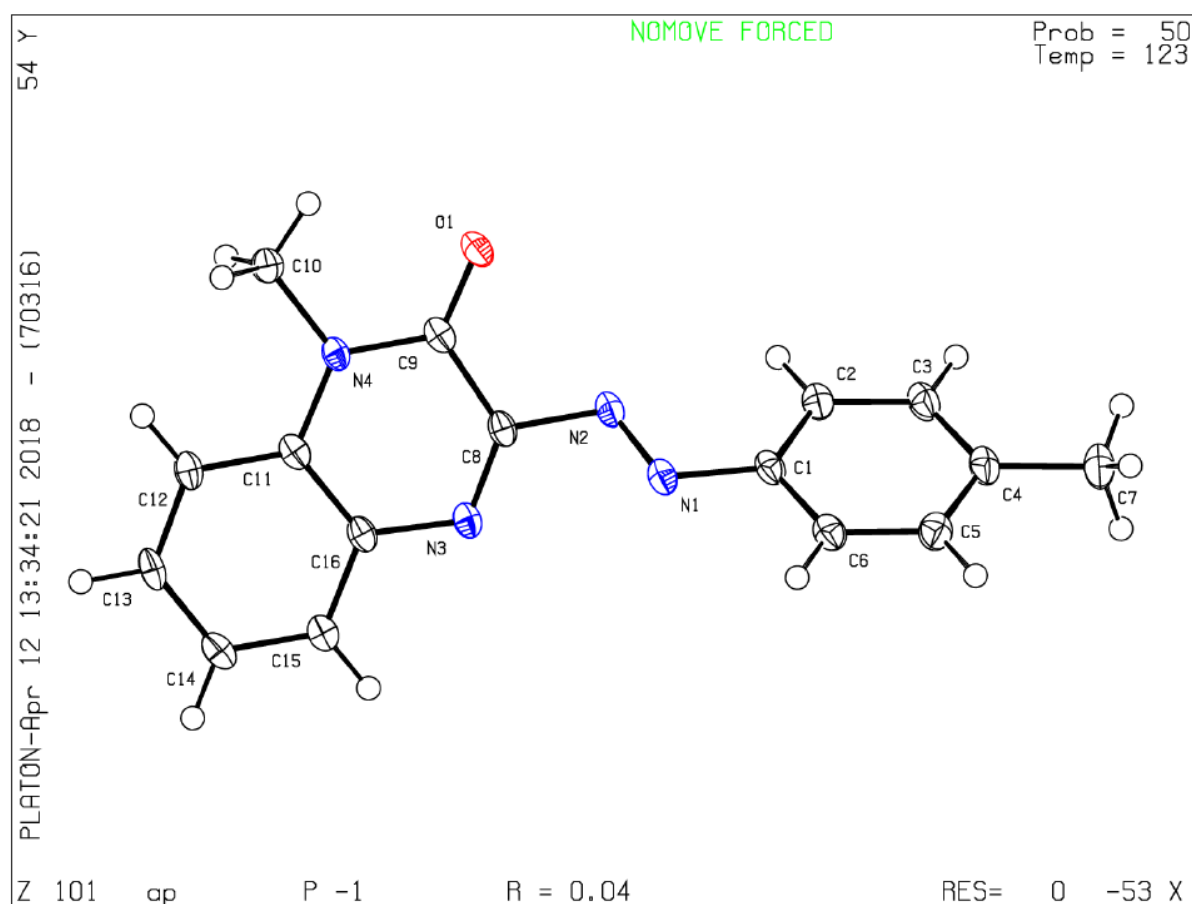



### Detailed Crystal Data

|                                             |                                                               |
|---------------------------------------------|---------------------------------------------------------------|
| Empirical formula                           | C <sub>16</sub> H <sub>14</sub> N <sub>4</sub> O              |
| Formula weight                              | 278.31                                                        |
| Temperature/K                               | 123(1)                                                        |
| Crystal system                              | triclinic                                                     |
| Space group                                 | P-1                                                           |
| a/Å                                         | 7.3051(5)                                                     |
| b/Å                                         | 9.2030(6)                                                     |
| c/Å                                         | 11.3965(8)                                                    |
| α/°                                         | 100.804(5)                                                    |
| β/°                                         | 97.060(5)                                                     |
| γ/°                                         | 113.159(6)                                                    |
| Volume/Å <sup>3</sup>                       | 675.35(9)                                                     |
| Z                                           | 1                                                             |
| ρ <sub>calc</sub> /g/cm <sup>3</sup>        | 0.684                                                         |
| μ/mm <sup>-1</sup>                          | 0.362                                                         |
| F(000)                                      | 146.0                                                         |
| Crystal size/mm <sup>3</sup>                | 0.309 × 0.195 × 0.088                                         |
| Radiation                                   | CuKα (λ = 1.54184)                                            |
| 2θ range for data collection/°              | 8.092 to 146.842                                              |
| Index ranges                                | -8 ≤ h ≤ 8, -7 ≤ k ≤ 11, -14 ≤ l ≤ 11                         |
| Reflections collected                       | 3951                                                          |
| Independent reflections                     | 2567 [R <sub>int</sub> = 0.0305, R <sub>sigma</sub> = 0.0405] |
| Data/restraints/parameters                  | 2567/0/192                                                    |
| Goodness-of-fit on F <sup>2</sup>           | 1.036                                                         |
| Final R indexes [I ≥ 2σ (I)]                | R <sub>1</sub> = 0.0443, wR <sub>2</sub> = 0.1179             |
| Final R indexes [all data]                  | R <sub>1</sub> = 0.0522, wR <sub>2</sub> = 0.1266             |
| Largest diff. peak/hole / e Å <sup>-3</sup> | 0.24/-0.29                                                    |

## X-ray structure

### Compound **16a**

**Experimental.** Single clear orange plate-shaped crystals of **16a** were obtained by recrystallisation from  $\text{CH}_2\text{Cl}_2$ . A suitable crystal  $0.29 \times 0.24 \times 0.04 \text{ mm}^3$  was selected and mounted on a suitable support on an GV1000, TitanS2 diffractometer. The crystal was kept at a steady  $T = 123.01(13) \text{ K}$  during data collection. The structure was solved with the **ShelXT** (Sheldrick, 2015)[S2] structure solution program using the Intrinsic Phasing solution method and by using **Olex2** (Dolomanov et al., 2009) [S1] as the graphical interface. The model was refined with version 2016/6 of **ShelXL** (Sheldrick, 2015) [S3] using Least Squares minimisation.

**Crystal Data.**  $\text{C}_{12}\text{H}_8\text{N}_4\text{S}$ ,  $M_r = 240.28$ , monoclinic,  $P2_1/n$  (No. 14),  $a = 7.0586(3) \text{ \AA}$ ,  $b = 7.5744(2) \text{ \AA}$ ,  $c = 20.8479(9) \text{ \AA}$ ,  $\beta = 98.124(3)^\circ$ ,  $\alpha = \gamma = 90^\circ$ ,  $V = 1103.44(7) \text{ \AA}^3$ ,  $T = 123.01(13) \text{ K}$ ,  $Z = 4$ ,  $Z' = 1$ ,  $\mu(\text{CuK}\alpha) = 2.445$ , 7909 reflections measured, 2196 unique ( $R_{\text{int}} = 0.0606$ ) which were used in all calculations. The final  $wR_2$  was 0.1380 (all data) and  $R_1$  was 0.0465 ( $I > 2(I)$ ).

Cambridge Structural Database CCDC: 1889897

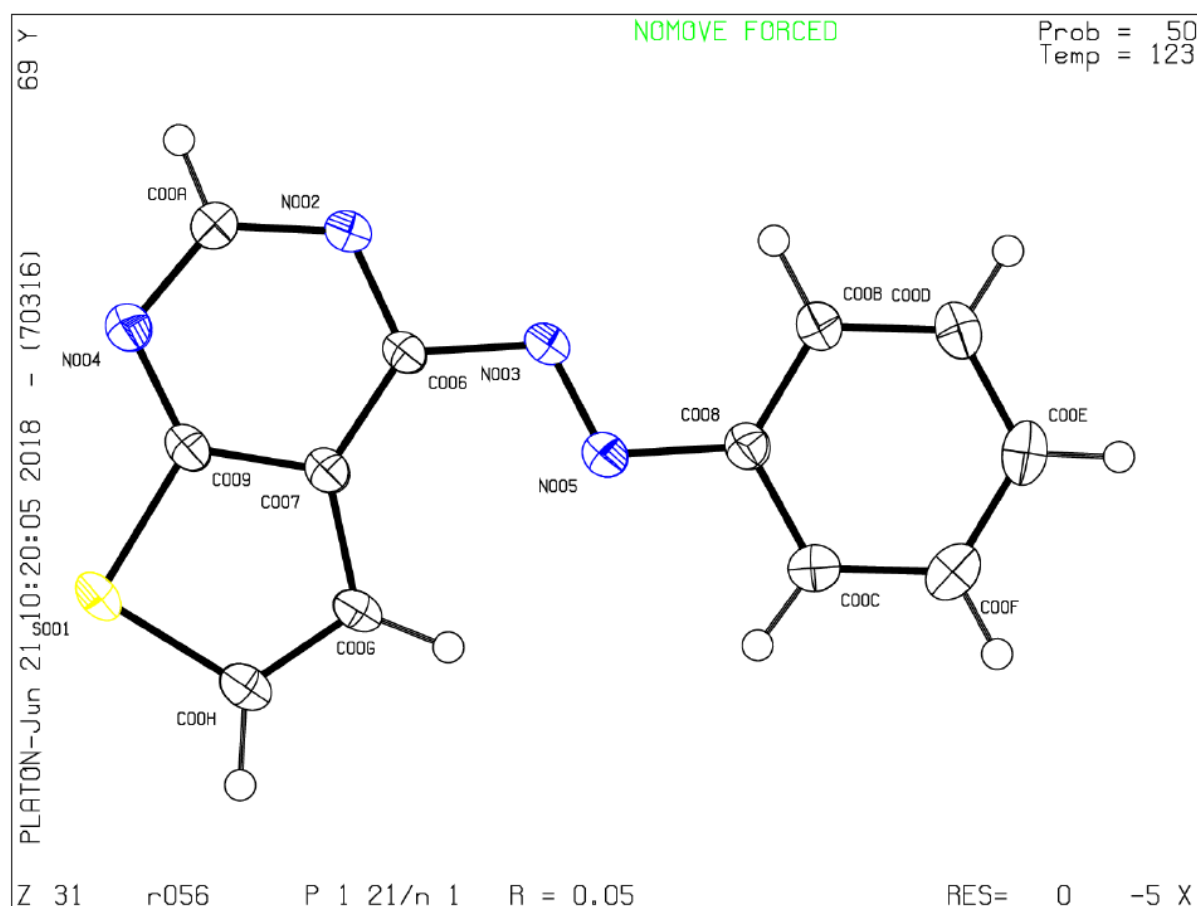

### Detailed crystal data

|                              |                                                 |
|------------------------------|-------------------------------------------------|
| Formula                      | C <sub>12</sub> H <sub>8</sub> N <sub>4</sub> S |
| $D_{calc.}/\text{g cm}^{-3}$ | 1.446                                           |
| $\mu/\text{mm}^{-1}$         | 2.445                                           |
| Formula Weight               | 240.28                                          |
| Colour                       | clear orange                                    |
| Shape                        | plate                                           |
| Size/mm <sup>3</sup>         | 0.29×0.24×0.04                                  |
| $T/\text{K}$                 | 123.01(13)                                      |
| Crystal System               | monoclinic                                      |
| Space Group                  | $P2_1/n$                                        |
| $a/\text{\AA}$               | 7.0586(3)                                       |
| $b/\text{\AA}$               | 7.5744(2)                                       |
| $c/\text{\AA}$               | 20.8479(9)                                      |
| $\alpha/^\circ$              | 90                                              |
| $\beta/^\circ$               | 98.124(3)                                       |
| $\gamma/^\circ$              | 90                                              |
| $V/\text{\AA}^3$             | 1103.44(7)                                      |
| $Z$                          | 4                                               |
| $Z'$                         | 1                                               |
| Wavelength/ $\text{\AA}$     | 1.54184                                         |
| Radiation type               | CuK $\alpha$                                    |
| $\theta_{min}/^\circ$        | 4.284                                           |
| $\theta_{max}/^\circ$        | 74.411                                          |
| Measured Refl.               | 7909                                            |
| Independent Refl.            | 2196                                            |
| Reflections with $I > 2(I)$  | 1981                                            |
| $R_{int}$                    | 0.0606                                          |
| Parameters                   | 186                                             |
| Restraints                   | 0                                               |
| Largest Peak                 | 0.344                                           |
| Deepest Hole                 | -0.369                                          |
| GooF                         | 1.099                                           |
| $wR_2$ (all data)            | 0.1380                                          |
| $wR_2$                       | 0.1321                                          |
| $R_1$ (all data)             | 0.0516                                          |
| $R_1$                        | 0.0465                                          |

## Experimental section

### Chemistry

Commercially available reagents and starting materials were purchased from the commercial suppliers abcr, Acros Organics, Alfa-Aesar, Fisher Scientific, Merck, Sigma Aldrich, TCI, or VWR and used without any further purification. Solvents were used in p.a. quality and dried according to standard procedures, if necessary. Dry nitrogen was used as an inert gas atmosphere. Flash column chromatography was performed using Sigma Aldrich MN silica gel 60 M (40–63  $\mu\text{m}$ , 230–400 mesh) for normal phase chromatography. Reaction monitoring via thin layer chromatography was performed on alumina plates coated with silica gel (Merck silica gel 60 F254, layer thickness 0.2 mm). Melting points were determined using a Stanford Research System OptiMelt MPA 100 and are uncorrected. NMR spectra were measured on a Bruker Avance 300 ( $^1\text{H}$  300.13 MHz,  $^{13}\text{C}$  75.48 MHz), Bruker Avance III HD 400 ( $^1\text{H}$  400.13 MHz,  $^{13}\text{C}$  100.61 MHz), Bruker Avance III HD 600 ( $^1\text{H}$  600.25 MHz,  $^{13}\text{C}$  150.95 MHz) and Bruker Avance III 600 ( $^1\text{H}$  600.25 MHz,  $^{13}\text{C}$  150.95 MHz). The spectra are referenced against residual non-deuterated NMR solvent signals (DMSO- $d_6$ :  $\delta_{\text{H}}$  = 2.50 ppm,  $\delta_{\text{C}}$  = 39.52 ppm;  $\text{CDCl}_3$ - $d$ :  $\delta_{\text{H}}$  = 7.26 ppm,  $\delta_{\text{C}}$  = 77.16 ppm) and chemical shifts  $\delta$  are reported in ppm. Resonance multiplicity is abbreviated as: s (singlet), d (doublet), t (triplet) and m (multiplet). Carbon NMR signals are assigned using DEPT 135 and  $^1\text{H}$ - $^{13}\text{C}$  HSQC spectra with (+) for primary/tertiary, (–) for secondary, and (q) for quaternary carbons. Mass spectra were recorded on a Finnigan MAT-SSQ 710 A, ThermoQuest Finnigan TSQ 7000, Agilent Q-TOF 6540 UHD, or a Jeol AccuTOF GCX instrument. UV–vis absorption spectroscopy was performed in 10 mm quartz cuvettes using an Agilent 8543, Agilent Cary 100, or Agilent Varian Cary 50 spectrometer. Analytical HPLC measurements were performed using an Agilent 1220 Infinity LC (column: Phenomenex Luna 3  $\mu\text{m}$  C18(2) 100 A, 150 x 2.00 mm; flow 0.3 mL min $^{-1}$  at 20 °C or 30 °C; solvent A: MilliQ water with 0.05 wt % TFA; solvent B: MeCN). The ratios at the PSSs were determined via analytical HPLC at 20 °C at the isosbestic points or via NMR spectroscopy. An Agilent 1260 system (column: Phenomenex Luna 10  $\mu\text{m}$  C18(2) 100 A, 250 x 21.2 mm; flow: 22 mL min $^{-1}$ ; solvent A: MilliQ water; solvent B: MeCN) was used for preparative HPLC purification. Light sources for irradiation:  $\lambda$  = 365 nm (Seoul Viosys CUN6GB1A, 1000 mA, 1.4 W),  $\lambda$  = 385 nm (Seoul Viosys CUN8GF1A, 1000 mA, 1.6 W),  $\lambda$  = 400 nm (Luxeon 400 nm SZ-01-S2, 500 mA, 0.48 W),  $\lambda$  = 455 nm (Osram OSLOM SSL 80 LD-CQ7P-1U3U, 1000 mA, 0.45 W). The power of the light is given based on the specifications supplied by the company when the LEDs were purchased.

### Methods

#### Chemistry

Compounds **2** [S4], **3** [S5], **6** [S6], **8** [S6], **10** [S7], **11** [S8], **14a–c** [S9], **19** [S10], **21** [S11], **25** [S12] and **26** [S13] were synthesized following adapted reported procedures.

**(E)-2-(p-Tolyldiazenyl)quinoxaline (5a)**. This compound was synthesized via an adapted literature reported procedure [S5]. Nitrosoquinoxaline **3** (479 mg, 3.0 mmol, 1.0 equiv) and *p*-toluidine (**4a**, 362 mg, 3.4 mmol, 1.1 equiv) were suspended in acetic acid (10 mL), refluxed for 10 min and stirred at room temperature for additional 16 hours. Purification by flash column chromatography using  $\text{CH}_2\text{Cl}_2$  as the eluent afforded the desired product as red solid (565 mg, 2.3 mmol, 76%).  $^1\text{H}$  NMR (300 MHz, DMSO- $d_6$ )  $\delta$  = 9.32 (s, 1H), 8.26 – 8.19 (m, 2H), 8.01 – 7.96 (m, 4H), 7.50 (d,  $J$  = 8.6 Hz, 1H), 2.45 (s, 3H).  $^{13}\text{C}$  NMR (75 MHz, DMSO)  $\delta$  = 155.6 (q), 150.7 (q), 144.8 (q), 142.9 (q), 141.0 (q), 138.5 (+), 131.9 (+), 131.8 (+), 130.8 (+), 130.3 (+), 129.4 (+), 123.9 (+), 21.7 (+). m.p. 135 °C. HRMS (ESI) calcd. for ( $\text{C}_{15}\text{H}_{13}\text{N}_4$ ) $^+$  [ $\text{M}+\text{H}$ ] $^+$ :  $m/z$  = 249.1135; found 249.1138.

**(E)-2-((3-Chloro-2-methylphenyl)diazenyl)quinoxaline (5b)**. This compound was synthesized via an adapted literature reported procedure [S5]. Nitrosoquinoxaline **3** (479 mg, 3.0 mmol, 1.0 equiv) and

aniline (**4b**, 479 mg, 3.4 mmol, 1.1 equiv) were mixed in acetic acid (10 mL) and heated to reflux for 10 min. The mixture was then heated at 50 °C for additional 16 hours. Purification by flash column chromatography using CH<sub>2</sub>Cl<sub>2</sub> as the eluent afforded the target compound as red solid (40%). <sup>1</sup>H NMR (300 MHz, DMSO-*d*<sub>6</sub>) δ = 9.35 (s, 1H), 8.32 – 8.18 (m, 2H), 8.06 – 7.94 (m, 2H), 7.74 (dd, *J* = 23.8, 8.1 Hz, 2H), 7.46 (t, *J* = 7.9 Hz, 1H), 2.81 (s, 3H). <sup>13</sup>C NMR (101 MHz, DMSO) δ = 155.6 (q), 151.7 (q), 143.1 (q), 141.0 (q), 138.4 (+), 137.9 (q), 135.7 (q), 133.9 (+), 132.2 (+), 131.9 (+), 130.3 (+), 129.5 (+), 128.3 (+), 114.5 (+), 14.7 (+). m.p. 140 °C. HRMS (ESI) calcd. for (C<sub>15</sub>H<sub>12</sub>ClN<sub>4</sub>)<sup>+</sup> [M+H]<sup>+</sup>: *m/z* = 283.0745; found 283.0745.

**(E)-2-Methoxy-3-(*p*-tolyl diazenyl)quinoxaline (12a)** and **(E)-1-methyl-3-(*p*-tolyl diazenyl)quinoxalin-2(1H)-one (12b)**. These compounds were synthesized via an adapted literature reported procedure [S14]. Compound **11** (359 mg, 1.36 mmol, 1.0 equiv) and potassium carbonate (188 mg, 1.36 mmol, 1.0 equiv) were suspended in DMF (6 mL). Then methyl iodide (193 mg, 1.36 mmol, 1.0 equiv) was added and the mixture stirred at room temperature for 16 hours. Water (2 mL/mmol) was added to the mixture and the aqueous layer extracted with ethyl acetate for three times. The combined organic layers were washed with brine, dried over magnesium sulfate, filtered and the solvent evaporated. Purification by flash column chromatography using petroleum ether/ethyl acetate 1:1 as eluent afforded the products **12a** and **12b**. Characterization of **12a**. Red solid (45.4 mg, 0.163 mmol, 12%). Gradient 0-13 min: MeCN/H<sub>2</sub>O 45:55 – 98:2, *t<sub>R</sub>* = 12.2 min. <sup>1</sup>H NMR (600 MHz, DMSO-*d*<sub>6</sub>) δ = 8.07 (dd, *J* = 8.2, 1.4 Hz, 1H), 7.97 – 7.88 (m, 3H), 7.82 (ddd, *J* = 8.4, 6.9, 1.5 Hz, 1H), 7.70 (ddd, *J* = 8.4, 7.0, 1.4 Hz, 1H), 7.48 (d, *J* = 8.1 Hz, 2H), 4.15 (s, 3H), 2.46 (s, 3H). <sup>13</sup>C NMR (75 MHz, CDCl<sub>3</sub>) δ = 154.2 (q), 151.6 (q), 149.4 (q), 144.0 (q), 141.5 (q), 137.8 (q), 130.5 (+), 130.2 (+), 129.9 (+), 127.4 (+), 126.8 (+), 124.1 (+), 54.4 (+), 21.8 (+). m.p. 137 °C. HRMS (ESI) calcd. for (C<sub>16</sub>H<sub>15</sub>N<sub>4</sub>O)<sup>+</sup> [M+H]<sup>+</sup>: *m/z* = 279.1240; found 279.1243. Characterization of **12b**. Orange solid (159 mg, 0.571 mmol, 42%). Gradient 0-10 min 45:55-90:10, *t<sub>R</sub>* = 7.5 min. <sup>1</sup>H NMR (400 MHz, DMSO-*d*<sub>6</sub>) δ = 7.87 (d, *J* = 8.4 Hz, 3H), 7.73 – 7.64 (m, 2H), 7.49 – 7.40 (m, 3H), 3.72 (s, 3H), 2.45 (s, 3H). <sup>13</sup>C NMR (101 MHz, DMSO) δ = 157.4 (q), 152.2 (q), 150.8 (q), 144.5 (q), 134.6 (q), 131.6 (+), 131.3 (q), 130.7 (+), 130.7 (+), 124.6 (+), 123.8 (+), 115.6 (+), 29.7 (+), 21.7 (+). m.p. 132 °C. HRMS (ESI) calcd. for (C<sub>16</sub>H<sub>15</sub>N<sub>4</sub>O)<sup>+</sup> [M+H]<sup>+</sup>: *m/z* = 279.1240; found 279.1243. Cambridge Structural Database CCDC: 1890055

**(E)-4-(Phenyldiazenyl)thieno[2,3-*d*]pyrimidine (16a)**. This compound was synthesized via an adapted literature reported procedure [S15]. 4-Chlorothieno[2,3-*d*]pyrimidine (**15c**, 200 mg, 1.2 mmol, 1.0 equiv), phenylhydrazine (**13b**, 152 mg, 1.4 mmol, 1.2 equiv), DIPEA (758 mg, 5.9 mmol, 5.0 equiv) and *n*-BuOH (5 mL) were mixed and stirred at 150 °C for 16 hours. The reaction mixture was cooled to room temperature and exposed to pure oxygen (balloon) for 24 hours. Purification by flash column chromatography using CH<sub>2</sub>Cl<sub>2</sub> as the eluent afforded the desired product as red solid (151 mg, 0.6 mmol, 53%). <sup>1</sup>H NMR (400 MHz, DMSO-*d*<sub>6</sub>) δ = 9.25 (s, 1H), 8.18 (d, *J* = 6.0 Hz, 1H), 8.13 – 8.10 (m, 2H), 7.89 (d, *J* = 6.0 Hz, 1H), 7.74 – 7.69 (m, 3H). <sup>13</sup>C NMR (101 MHz, DMSO) δ = 172.1 (q), 161.4 (q), 153.7 (+), 152.7 (q), 134.4 (+), 131.9 (+), 130.3 (+), 124.0 (+), 121.7 (q), 120.6 (+). m.p. 106 °C. HRMS (ESI) calcd. for (C<sub>12</sub>H<sub>9</sub>N<sub>4</sub>S)<sup>+</sup> [M+H]<sup>+</sup>: *m/z* = 241.0542; found 241.0540. Cambridge Structural Database CCDC: 1889897

**(E)-6-((2-Chlorophenyl)diazenyl)-9H-purine (16b)**. This compound was synthesized via an adapted literature reported procedure [S15]. 6-Chloro-9-isopropyl-9H-purine (371 mg, 2.4 mmol, 1.0 equiv), *o*-chlorophenylhydrazine (411 mg, 2.9 mmol, 1.2 equiv), DIPEA (1.55 g, 12 mmol, 5.0 equiv) and *n*-BuOH (16 mL) were mixed and stirred in a glass vial at 150 °C for 16 hours. The reaction mixture was cooled to room temperature and exposed to pure oxygen (balloon) for 24 hours. The solvent was removed and the product purified by flash column chromatography using CH<sub>2</sub>Cl<sub>2</sub> + 5% MeOH to afford **16b** as red solid (417 mg, 1.6 mmol, 67%). <sup>1</sup>H NMR (400 MHz, DMSO-*d*<sub>6</sub>) δ = 13.26 (s, 1H), 9.10 (s, 1H), 8.83 (s, 1H), 7.82 – 7.78 (m, 2H), 7.73 – 7.69 (m, 1H), 7.60 – 7.55 (m, 1H). <sup>13</sup>C NMR (101 MHz, DMSO) δ = 152.3 (+), 149.0 (q), 135.8 (q), 135.2 (+), 131.5 (+), 128.7 (+), 118.2 (+). m.p. 179 °C. HRMS (ESI) calcd. for (C<sub>11</sub>H<sub>8</sub>ClN<sub>6</sub>)<sup>+</sup> [M+H]<sup>+</sup>: *m/z* = 259.0493; found 259.0493.

**(E)-6-(Naphthalen-1-yl diazenyl)-9H-purine (16c).** This compound was synthesized via an adapted literature reported procedure [S15]. A mixture of chloroadenine **15a** (93.0 mg, 0.60 mmol, 1.0 equiv), hydrazine **14b** (114 mg, 0.72 mmol, 1.2 equiv) and DIPEA (388 mg, 0.52 mL, 3.0 mmol, 5.0 equiv) in *n*-butanol (4.0 mL) was stirred at 150 °C for 16 hours. After cooling to room temperature, the solution was exposed to an oxygen atmosphere (balloon) for 24 hours. The product was purified by column chromatography using CH<sub>2</sub>Cl<sub>2</sub> + 5% MeOH as eluent and subsequent preparative HPLC (gradient 0-20 min: MeCN/H<sub>2</sub>O 10:90 – 98:2) and afforded adenine-azo **16c** as red solid (*t<sub>R</sub>* = 11.47 min, 92.0 mg, 0.37 mmol, 62%). NMR (400 MHz, DMSO-*d*<sub>6</sub>) δ = 13.53 (s, 1H), 9.14 (s, 1H), 8.91 (d, *J* = 8.4 Hz, 1H), 8.85 (s, 1H), 8.31 (d, *J* = 8.0 Hz, 1H), 8.13 (d, *J* = 8.0 Hz, 1H), 7.99 (d, *J* = 7.5 Hz, 1H), 7.80 – 7.70 (m, 3H). <sup>13</sup>C NMR (151 MHz, DMSO) δ = 155.0 (q), 151.8 (+), 149.3 (q), 147.7 (+), 134.0 (+), 133.9 (q), 130.2 (q), 128.2 (+), 128.0 (+), 127.0 (+), 125.8 (+), 123.3 (+), 113.6 (q). m.p. 110 °C. HRMS (ESI) calcd. for (C<sub>15</sub>H<sub>11</sub>N<sub>6</sub>)<sup>+</sup> [M+H]<sup>+</sup>: *m/z* = 275.1040; found 275.1044.

**(E)-9-Methyl-6-(naphthalen-1-yl diazenyl)-9H-purine (16d).** This compound was synthesized via an adapted literature reported procedure [S15]. A mixture of methylated chloroadenine **15b** (101 mg, 0.60 mmol, 1.0 equiv), hydrazine **14b** (114 mg, 0.72 mmol, 1.2 equiv) and DIPEA (388 mg, 0.52 mL, 3.0 mmol, 5.0 equiv) in *n*-butanol (4.0 mL) was stirred at 150 °C for 16 hours. After cooling to room temperature, the solution was exposed to an oxygen atmosphere (balloon) for 24 hours. The product was purified by column chromatography using CH<sub>2</sub>Cl<sub>2</sub> + 5% MeOH as eluent and subsequent preparative HPLC (gradient 0-20 min: MeCN/H<sub>2</sub>O 10:90 to 98:2) and afforded the methylated azoadenine **16d** as red solid (*t<sub>R</sub>* = 12.91 min, 130 mg, 0.45 mmol, 75%). <sup>1</sup>H NMR (400 MHz, Chloroform-*d*) δ = 9.13 (s, 1H), 9.08 (d, *J* = 7.3 Hz, 1H), 8.27 (s, 1H), 8.09 (d, *J* = 7.8 Hz, 2H), 7.94 (d, *J* = 7.8 Hz, 1H), 7.71 – 7.66 (m, 1H), 7.62 – 7.58 (m, 2H), 4.00 (s, 3H). <sup>13</sup>C NMR (101 MHz, CDCl<sub>3</sub>) δ = 158.0 (q), 155.6 (q), 152.7 (+), 148.6 (q), 147.5 (+), 134.3 (q), 134.1 (+), 132.0 (q), 127.9 (+), 127.9 (+), 126.8 (+), 126.0 (q), 125.4 (+), 123.9 (+), 113.0 (+), 30.2 (+). m.p. 186 °C. HRMS (ESI) calcd. for (C<sub>16</sub>H<sub>13</sub>N<sub>6</sub>)<sup>+</sup> [M+H]<sup>+</sup>: *m/z* = 289.1196; found 289.1198.

**(E)-6-((4-(Phenyldiazenyl)benzyl)thio)-7H-purine (23).** This compound was synthesized via an adapted literature reported procedure [S16]. A solution of chloromethylated azobenzene **21** (800 mg, 3.5 mmol, 1.1 equiv) in DMF (10 mL) was added to a solution of 6-mercaptapurine **22** (151 mg, 3.2 mmol, 1.0 equiv) in 2 M NaOH (10 mL) and the mixture stirred at room temperature for 3 hours. The solvent was evaporated and the product purified by flash column chromatography using CH<sub>2</sub>Cl<sub>2</sub> + 5% MeOH as the eluent. Evaporation of the solvent afforded the desired product as orange solid (215 mg, 0.62 mmol, 18%). <sup>1</sup>H NMR (400 MHz, DMSO-*d*<sub>6</sub>) δ = 13.55 (s, 1H), 8.76 (s, 1H), 8.46 (s, 1H), 7.89 – 7.83 (m, 4H), 7.68 (d, *J* = 8.4 Hz, 2H), 7.59 – 7.55 (m, 3H), 4.76 (s, 2H). <sup>13</sup>C NMR (101 MHz, DMSO) δ = 158.3 (q), 152.4 (q), 151.9 (+), 151.4 (q), 149.9 (q), 143.6 (q), 142.4 (q), 132.0 (+), 130.5 (+), 129.9 (+), 123.2 (+), 123.0 (+), 31.7 (-). m.p. 212 °C. HRMS (ESI) calcd. for (C<sub>18</sub>H<sub>15</sub>N<sub>6</sub>S)<sup>+</sup> [M+H]<sup>+</sup>: *m/z* = 347.1073; found 347.1077.

**(E)-4-(Phenyldiazenyl)-N-(9H-purin-6-yl)benzamide (28).** This compound was synthesized via an adapted literature reported procedure [S17]. Chlorocarbonylazobenzene **26** (636 mg, 2.6 mmol, 1.1 equiv) was added dropwise over 30 min to a stirred suspension of adenine **27** (324 mg, 2.4 mmol, 1.0 equiv) in dry pyridine and stirring was continued for two hours at 100 °C. The mixture was cooled to room temperature and stirred for additional 16 hours. The reaction was quenched with methanol and the solvents were removed under reduced pressure. Purification by column chromatography using CH<sub>2</sub>Cl<sub>2</sub> as the eluent afforded the desired product as orange solid (684 mg, 2.0 mmol, 83%). <sup>1</sup>H NMR (400 MHz, DMSO-*d*<sub>6</sub>) δ = 11.69 (s, 1H), 8.76 (s, 1H), 8.54 (s, 1H), 8.32 (d, *J* = 8.3 Hz, 2H), 8.03 (d, *J* = 8.3 Hz, 2H), 7.97 – 7.94 (m, 2H), 7.67 – 7.62 (m, 3H). <sup>13</sup>C NMR (101 MHz, DMSO) δ = 166.2 (q), 154.5 (q), 152.4 (q), 151.6 (+), 146.3 (+), 135.5 (q), 132.7 (+), 130.5 (+), 130.1 (+), 123.3 (+), 122.9 (+). m.p. 271 °C. HRMS (ESI) calcd. for (C<sub>18</sub>H<sub>14</sub>N<sub>7</sub>O)<sup>+</sup> [M+H]<sup>+</sup>: *m/z* = 344.1254; found 344.1257.

#### Cell culture and transfection

The subtype A of 5-HT<sub>3</sub> receptors was heterologously expressed in cultured Chinese hamster ovary (CHO) cells obtained from the American Type Tissue Culture Collection (ATCC, Molsheim, France). Transfection with cDNA of 5-HT<sub>3A</sub> receptors was performed using the Lipofectamine 3000 protocol (Life Technology, USA). For identification of transfected cells a cDNA of green fluorescent protein (GFP) was co-transfected with cDNA of 5-HT<sub>3</sub>ARs. Three hours after the initial exposure of cells to the cDNAs the culture medium was replaced with fresh medium. Electrophysiological recordings were carried out on fluorescent cells 24–72 hours after transfection.

#### Electrophysiological recordings

Whole-cell patch-clamp recordings were held at room temperature (20–25 °C) using an EPC-9 amplifier (HEKA Elektronik, Germany). Cells were continuously superfused with external solution containing (mM): NaCl 140, CaCl<sub>2</sub> 2, KCl 2.8, MgCl<sub>2</sub> 4, HEPES 20, glucose 10; pH 7.4; 320–330 mOsm. Intracellular solution used for filling recording patch pipettes contained (mM): KCl 140, MgCl<sub>2</sub> 2, MgATP 2, BAPTA (tetrapotassium salt) 2; pH 7.3; 290 mOsm. Recording pipettes were pulled from borosilicate glass capillaries (Harvard Apparatus Ltd, USA) and had resistances of 5–10 MOhm. Rapid replacement of solutions was provided by fast application system (SF 77A Perfusion Fast-Step, Warner, USA), placed 40–50 µm above the recorded cell. Cells with low input resistance (<150 MOhm) and a rapid run-down (>30% with repetitive application) were excluded from analysis. The agonist 5-HT for the activation was applied alone or mixed with studied compounds during 5 s. Irradiation with the light of 455 nm or 530 nm was provided by LEDs (Thorlabs) placed at the distance of 4–5 cm from the studied cells.

## References

- [S1] O.V. Dolomanov and L.J. Bourhis and R.J. Gildea and J.A.K. Howard and H. Puschmann, Olex2: A complete structure solution, refinement and analysis program, *J. Appl. Cryst.* **2009**, *42*, 339-341.
- [S2] Sheldrick, G.M., ShelXT-Integrated space-group and crystal-structure determination, *Acta Cryst.*, **2015**, *A71*, 3-8.
- [S3] Sheldrick, G.M., Crystal structure refinement with ShelXL, *Acta Cryst.* **2015**, *C27*, 3-8.
- [S4] M. von Wantoch Rekowski, A. Pyriochou, N. Papapetropoulos, A. Stöbel, A. Papapetropoulos, A. Giannis, *Bioorg. Med. Chem.* **2010**, *18*, 1288-1296.
- [S5] K. Harsányi, C. Gönczi, D. Korbonits, *Liebigs Ann. Chem.* **1973**, *2*, 190-194.
- [S6] S. Murarka, P. Martín-Gago, C. Schultz-Fademrecht, A. Al Saabi, M. Baumann, E. K. Fansa, S. Ismail, P. Nussbaumer, A. Wittinghofer, H. Waldmann, *Chem. Eur. J.* **2017**, *23*, 6083-6093.
- [S7] V. Colotta, D. Catarzi, F. Varano, L. Cecchi, G. Filacchioni, A. Galli, C. Costagli, *Arch. Pharm. Pharm. Med. Chem.* **1997**, *330*, 387-391.
- [S8] C. Párkányi, A. O. Abdelhamid, *J. Heterocyclic Chem.* **1984**, *21*, 521-524.
- [S9] X. Wang, Y.-F. Chen, W. Yan, L.-L. Cao, Y.-H. Ye, *Molecules* **2016**, *21*, 1574-1588.
- [S10] P. Stawski, M. Sumser, D. Trauner, *Angew. Chem. Int. Ed.* **2012**, *51*, 5748-5751.
- [S11] J. del Barrio, P. N. Horton, D. Lairez, G. O. Lloyd, C. Toprakcioglu, O. A. Scherman, *J. Am. Chem. Soc.* **2013**, *135*, 11760-11763.
- [S12] F.-N. Meng, Z.-Y. Li, Y.-L. Ying, S.-C. Liu, J. Zhang, Y.-T. Long, *Chem. Com.* **2017**, *53*, 9462-9465.
- [S13] G. H. Coleman, G. Nichols, C. M. McCloskey, H. D. Anspon, *Organic Syntheses* **1945**, *25*, 87-89.
- [S14] S. Pierau, G. Dale, *Assignee Morphochem Aktiengesellschaft fuer Kombinatorische Chemie Germany* **2006**, *WO 2006021448 A1*.
- [S15] D. Kolarski, W. Szymanski, B. L. Feringa, *Org. Lett.* **2017**, *19*, 5090-5093.
- [S16] S. A. Laufer, D. M. Domeyer, T. R. F. Scior, W. Albrecht, D. R. J. Hauser, *J. Med. Chem.* **2005**, *48*, 710-722.
- [S17] C. F. Liu, Y. Zeng, X. W. Lu, *Assignee Nanyang, Technological University* **2010**, *WO2010027326 A1*.
